# Supplementary material
Source: PubMed Central journal article supplement (PMC7469689)
Supplement: ci0c00202_si_001.pdf [file ci0c00202_si_001.pdf]

## Supporting information:

# Substituted 4,5'-Bithiazoles as Catalytic Inhibitors of Human DNA Topoisomerase II $\alpha$

Kaja Bergant Loboda<sup>1,3</sup>, Matej Janežič<sup>2</sup>, Martina Štampar<sup>4</sup>, Bojana Žegura<sup>4</sup>, Metka Filipič<sup>4</sup> and  
Andrej Perdih<sup>1\*</sup>

*<sup>1</sup>National Institute of Chemistry, Hajdrihova 19, SI 1000 Ljubljana, Slovenia*

*<sup>2</sup>Structural Bioinformatics Team, Division of Structural and Synthetic Biology, Center for Life  
Science Technologies, RIKEN, 1-7-22 Suehiro, Tsurumi, Yokohama, Kanagawa, 230-0045,  
Japan*

*<sup>3</sup>University of Ljubljana, Faculty of Pharmacy, Aškerčeva 7 SI 1000 Ljubljana, Slovenia*

*<sup>4</sup>National Institute of Biology, Department of Genetic Toxicology and Cancer Biology, Večna  
pot 111, 1000 Ljubljana, Slovenia*

*\* Corresponding author:*

Andrej Perdih

National Institute of Chemistry

Hajdrihova 19, SI-1001 Ljubljana, Slovenia

Tel.: +386-1-4760-376

e-mail: [andrej.perdih@ki.si](mailto:andrej.perdih@ki.si)

## 1. Tested commercially available substituted 4,5'-bithiazoles

Table S1. List of compounds tested for their inhibitory activity on human topo II $\alpha$

| Number | Chemical code | Vendor                   |
|--------|---------------|--------------------------|
| 1      | STK163157     | VitasM Labs <sup>1</sup> |
| 2      | 7872757       | ChemBridge <sup>2</sup>  |
| 3      | 7858097       | ChemBridge <sup>2</sup>  |
| 4      | 7211760312    | Otava <sup>3</sup>       |
| 5      | STK015148     | VitasM Labs <sup>1</sup> |
| 6      | 7859208       | ChemBridge <sup>2</sup>  |
| 7      | 5936031       | ChemBridge <sup>2</sup>  |
| 8      | 5934630       | ChemBridge <sup>2</sup>  |
| 9      | 5935030       | ChemBridge <sup>2</sup>  |
| 10     | 5932095       | ChemBridge <sup>2</sup>  |
| 11     | STK070262     | VitasM Labs <sup>1</sup> |
| 12     | 5932282       | ChemBridge <sup>2</sup>  |
| 13     | 5935989       | ChemBridge <sup>2</sup>  |
| 14     | 7211760371    | Otava <sup>3</sup>       |

## 2. Validation of the docking procedure and molecular docking of substituted 4,5'-bithiazoles

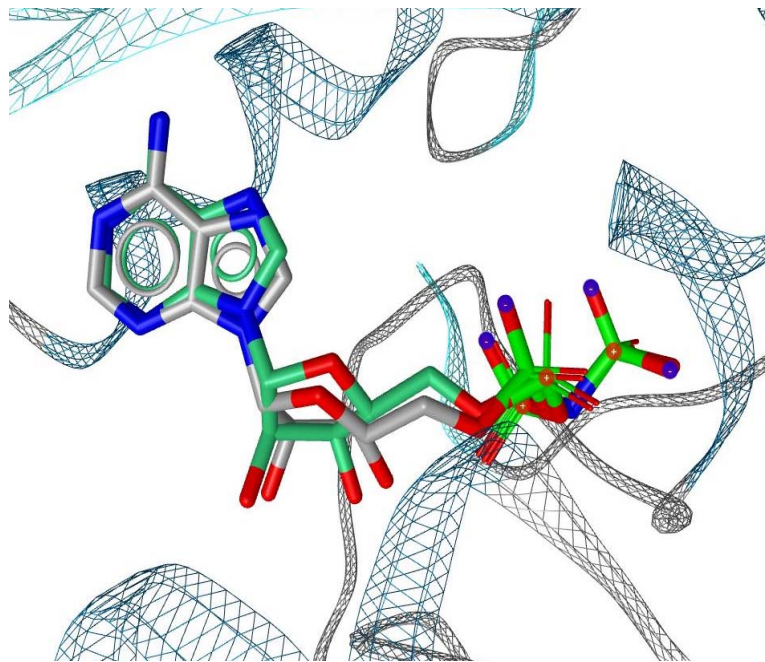

**Figure S1.** Comparison of the docked and x-ray conformation of AMP-PNP in the ATP human topo II $\alpha$  binding site using GoldScore scoring function (PDB: 1ZXN). RMSD of 0.9 Å between heavy atoms of both poses was obtained.

**Table S2.** (above) 2D Intermolecular interaction pattern of the AMP-PNP ligand in the ATP bindings sites of both type II topoisomerases. (bellow) Selected amino acid pairs, important for ATP binding, that are equal/similar or different in the ATP binding sites of human topo II $\alpha$  and DNA gyrase.

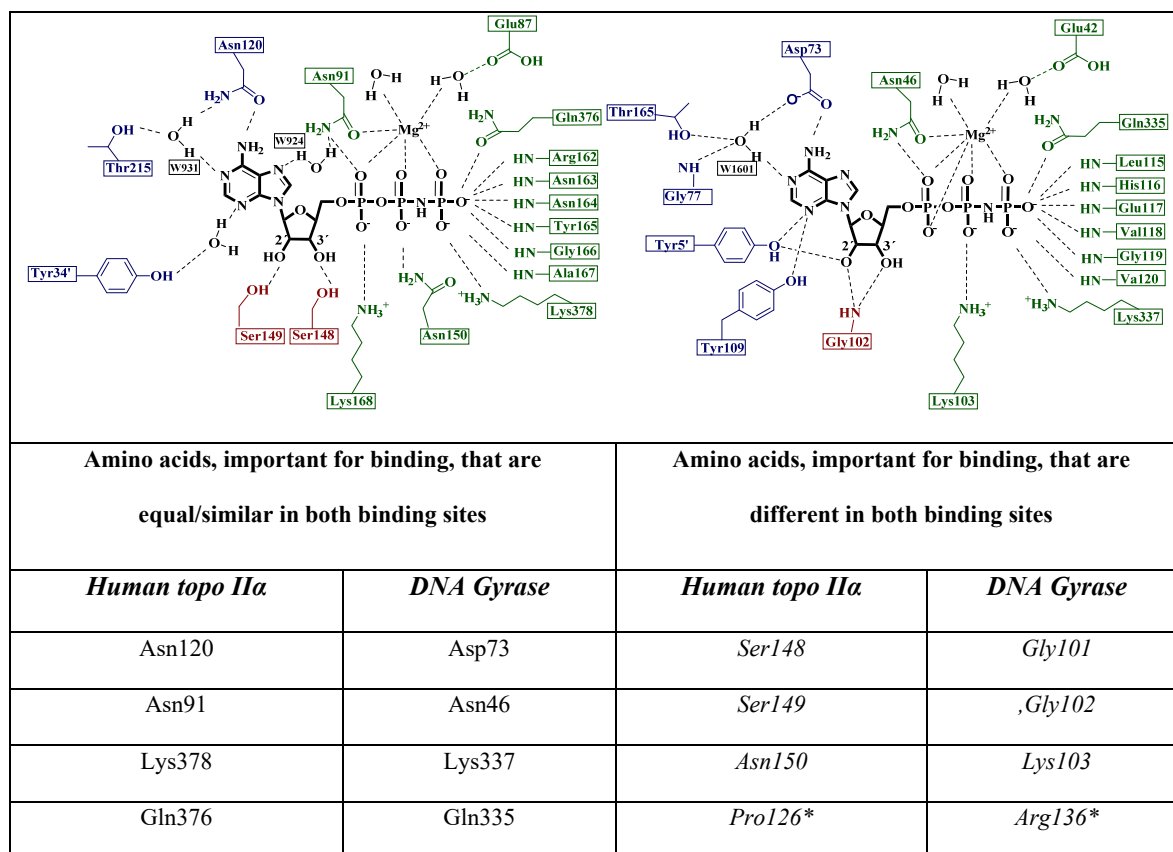

\*residue pair Pro126(htII $\alpha$ )/Arg136(DNA Gyrase) is listed since ARG136 plays a role in binding of 4,5'-bithiazole compound **13** to the DNA Gyrase ATP binding site.

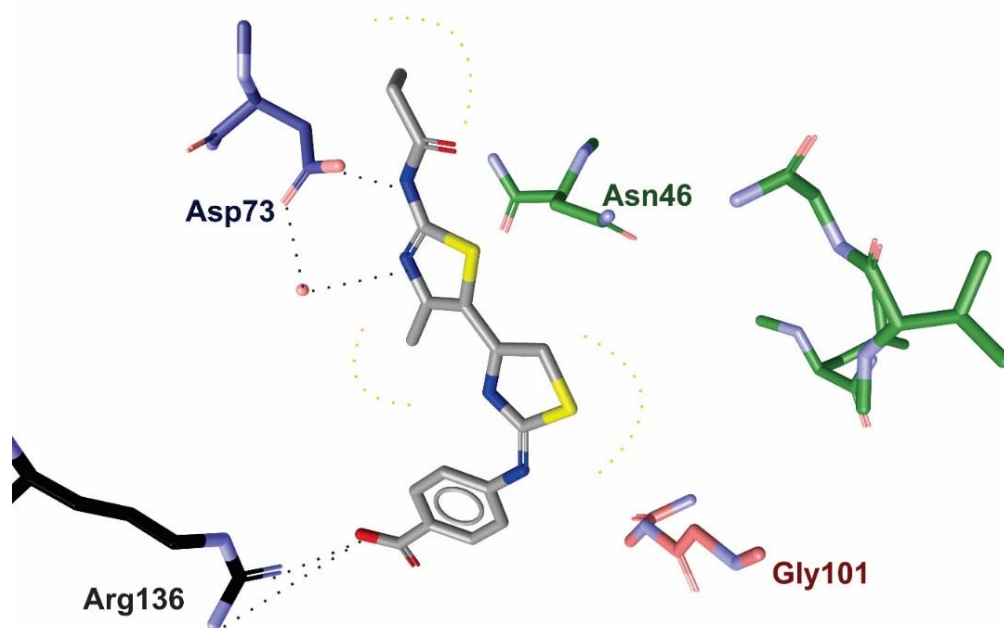

**Figure S2.** Docking binding mode of compound **13** in the DNA gyrase ATP binding site generated using gyrase crystal structure with the bound AMP-PNP substrate (PDB: 1E11).

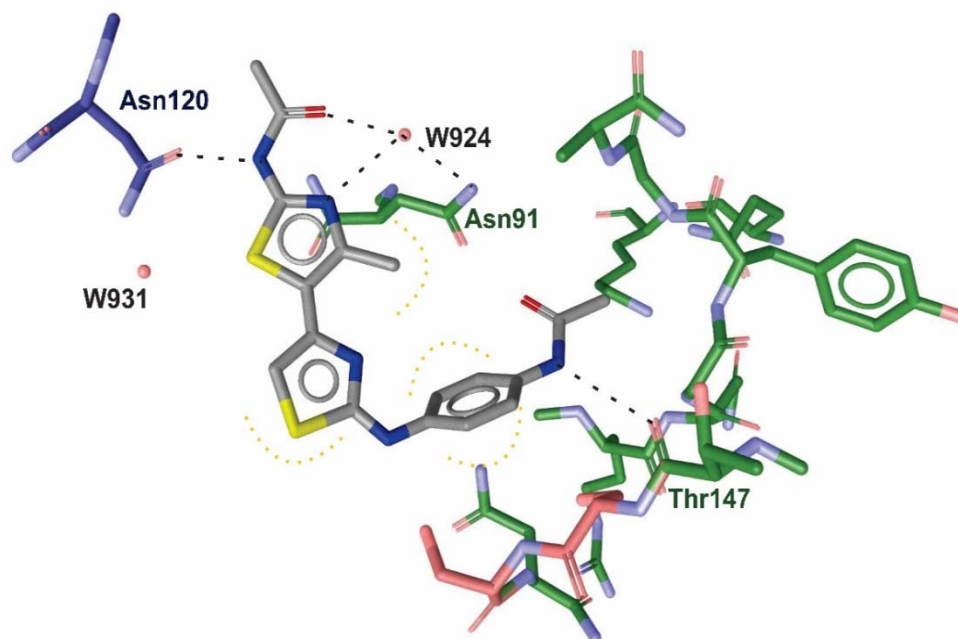

**Figure S3.** Proposed docking binding modes of active substituted 4,5'-bithiazole **9** in the human topo II $\alpha$  ATP binding site (PDB: 1ZXN).

### 3. Comparison of the bacterial DNA gyrase vs. human topoisomerase II $\alpha$ inhibition activities for compounds selected by both virtual screenings

**Table S3.** Comparison of the human topo II $\alpha$  and bacterial DNA Gyrase inhibition vales for compounds that were selected in this screening assays as well as also by our previous virtual screening campaign on bacterial DNA Gyrase [ref 39].

| <b>Compound</b> | <b>IC<sub>50</sub> [<math>\mu</math>M]<br/>bacterial DNA gyrase</b> | <b>IC<sub>50</sub> [<math>\mu</math>M]<br/>human topo II<math>\alpha</math></b> |
|-----------------|---------------------------------------------------------------------|---------------------------------------------------------------------------------|
| <b>5</b>        | 8.2                                                                 | 70.1                                                                            |
| <b>6</b>        | 67                                                                  | 37.7                                                                            |
| <b>8</b>        | 5.5                                                                 | 119.7                                                                           |
| <b>12</b>       | 30.0                                                                | 192.9                                                                           |
| <b>13</b>       | 1.1                                                                 | 123.0                                                                           |

#### 4. Molecular dynamics simulation and dynophore calculations

**Table S4.** Assigned atom types and partial atomic charges of compound **1** using CHARMM General Force Field (CGenFF).

| Name       | Type   | q      | Name       | Type   | q      |
|------------|--------|--------|------------|--------|--------|
| <b>C1</b>  | CG2R57 | -0,121 | <b>C18</b> | CG2R61 | -0,115 |
| <b>C2</b>  | CG2R57 | 0,277  | <b>H19</b> | HGR61  | 0,155  |
| <b>N3</b>  | NG2R50 | -0,638 | <b>H20</b> | HGR61  | 0,250  |
| <b>C4</b>  | CG2R53 | 0,341  | <b>H21</b> | HGR61  | 0,250  |
| <b>S5</b>  | SG2R50 | 0,015  | <b>H22</b> | HGR61  | 0,115  |
| <b>C6</b>  | CG2R51 | -0,239 | <b>H23</b> | HGPAM1 | 0,376  |
| <b>H7</b>  | HGR52  | 0,210  | <b>C24</b> | CG2R51 | 0,276  |
| <b>N8</b>  | NG311  | -0,310 | <b>N25</b> | NG2R50 | -0,624 |
| <b>C9</b>  | CG2R61 | -0,034 | <b>C26</b> | CG2R53 | 0,280  |
| <b>C10</b> | CG2R61 | -0,115 | <b>S27</b> | SG2R50 | 0,020  |
| <b>C11</b> | CG2R61 | -0,196 | <b>N28</b> | NG321  | -0,574 |
| <b>C12</b> | CG2R61 | -0,432 | <b>H29</b> | HGPAM2 | 0,334  |
| <b>C13</b> | CG302  | 0,803  | <b>H30</b> | HGPAM2 | 0,334  |
| <b>F14</b> | FGA3   | -0,159 | <b>C31</b> | CG331  | -0,195 |
| <b>F15</b> | FGA3   | -0,159 | <b>H32</b> | HGA3   | 0,090  |
| <b>F16</b> | FGA3   | -0,159 | <b>H33</b> | HGA3   | 0,090  |
| <b>C17</b> | CG2R61 | -0,196 | <b>H34</b> | HGA3   | 0,090  |

#### 4.1 Measured time-dependant distances between selected protein atoms and Compound 1

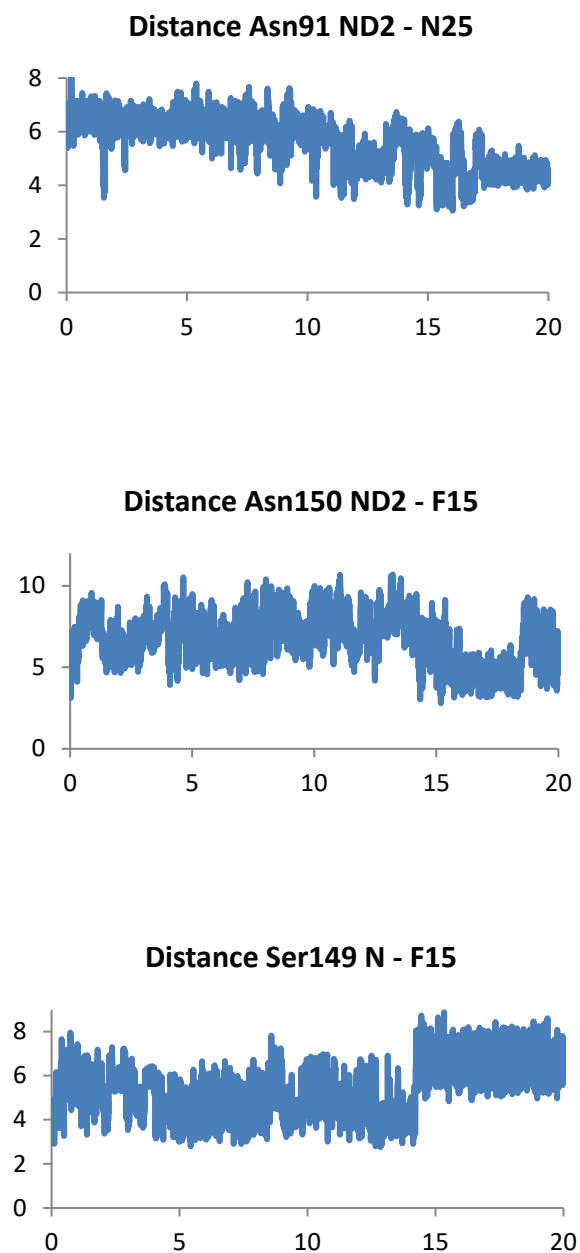

**Figure S4.** Measured time-dependant distances between selected protein atoms and compound 1 during the MD simulation.



## 5. Results of the human topo II $\alpha$ and human topo II $\beta$ decatenation assay

**Table S5:** Results of the decatenation assay catalysed by human topo II $\alpha$  for compounds **1** and **9** and positive control etoposide. Results are represented as % of decatenated kDNA.

| Compound         | % Decatenated Assay 1    |      |      |     | % Decatenated Assay 2    |      |      |      | % Decatenated Average    |      |      |      |
|------------------|--------------------------|------|------|-----|--------------------------|------|------|------|--------------------------|------|------|------|
|                  | Concentration ( $\mu$ M) |      |      |     | Concentration ( $\mu$ M) |      |      |      | Concentration ( $\mu$ M) |      |      |      |
|                  | 3.9                      | 31.5 | 125  | 500 | 3.9                      | 31.5 | 125  | 500  | 3.9                      | 31.5 | 125  | 500  |
| <b>Etoposide</b> | 100                      | 91   | 21.6 | 1.5 | 100                      | 96.7 | 44   | 7.2  | 100                      | 93.9 | 32.8 | 4.4  |
| <b>1</b>         | 100                      | 72.4 | 0    | 0   | 91                       | 89.4 | 0    | 0    | 95.5                     | 80.9 | 0    | 0    |
| <b>9</b>         | 98.7                     | 99.4 | 89.5 | 34  | 99.2                     | 97.9 | 86.7 | 31.3 | 98.9                     | 98.7 | 88.1 | 32.7 |

**Table S6:** Results of the decatenation assay catalysed by human topo II $\beta$  for compounds **1** and **9** and positive control etoposide). Results are represented as % of decatenated kDNA.

| Compound         | % Decatenated Assay 1    |      |      |      | % Decatenated Assay 2    |      |      |      | % Decatenated Average    |      |      |      |
|------------------|--------------------------|------|------|------|--------------------------|------|------|------|--------------------------|------|------|------|
|                  | Concentration ( $\mu$ M) |      |      |      | Concentration ( $\mu$ M) |      |      |      | Concentration ( $\mu$ M) |      |      |      |
|                  | 3.9                      | 31.5 | 125  | 500  | 3.9                      | 31.5 | 125  | 500  | 3.9                      | 31.5 | 125  | 500  |
| <b>Etoposide</b> | 100.0                    | 94.0 | 24.6 | 15.0 | 100.0                    | 92.8 | 23.1 | 14.4 | 100.0                    | 93.4 | 23.9 | 14.7 |
| <b>1</b>         | 87.3                     | 78.6 | 0    | 0    | 95.5                     | 79.7 | 0    | 0    | 91.3                     | 79.2 | 0    | 0    |
| <b>9</b>         | 87.0                     | 80.1 | 30.5 | 17.5 | 75.6                     | 73.3 | 21.7 | 5.3  | 81.3                     | 76.7 | 26.1 | 11.4 |

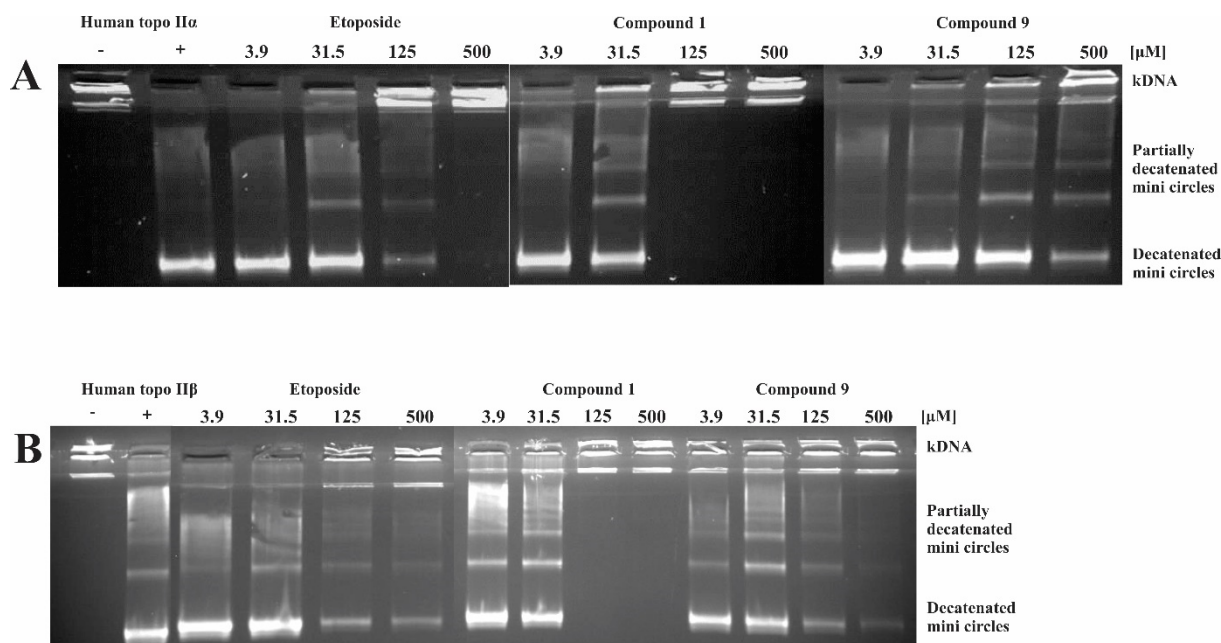

**Figure S5:** (A) Results of the second run of the decatenation assay of human topo II $\alpha$  for compounds **1**, **9** and etoposide. The assay was performed at 4 different concentrations (3.9, 31.5, 125 and 500  $\mu$ M) of compound **1** and **9** and reference compound etoposide. (B) Results of the second run of the decatenation assay of human topo II $\beta$  for compounds **1**, **9** and

etoposide. The assay was performed at 4 different concentrations (3.9, 31.5, 125 and 500  $\mu\text{M}$ ) of compound **1**, **9** and reference compound etoposide.

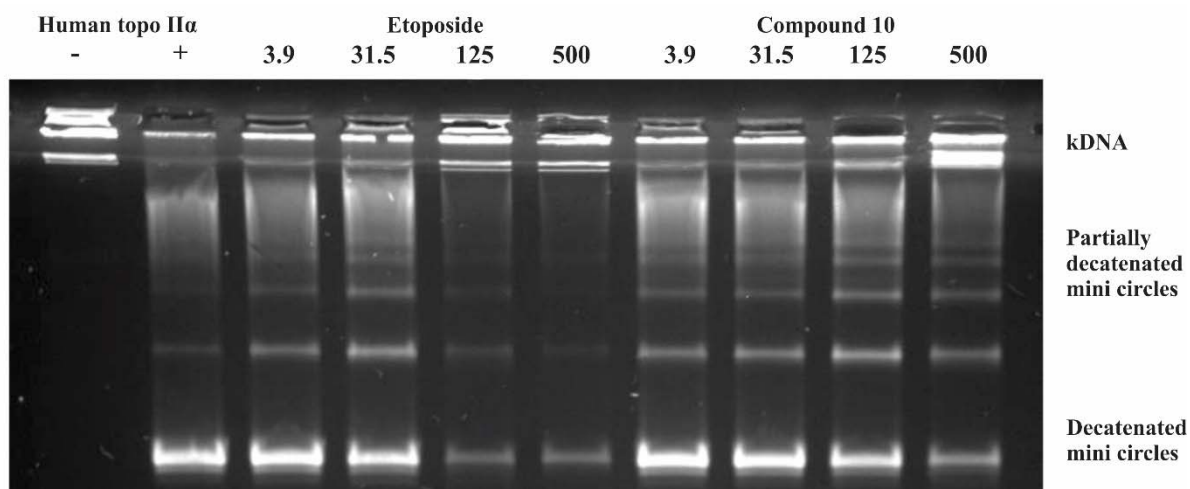

**Figure S6.** Results of the first run of the human topo II $\alpha$  decatenation assay for compound **10** and etoposide. The assay was performed at 4 different concentrations (3.9, 31.5, 125 and 500  $\mu\text{M}$ ) of compound **10** and reference compound etoposide. Compound **10** inhibited 64% decatenation at concentration 500  $\mu\text{M}$  and 26% at 125  $\mu\text{M}$ . Experiment was performed in duplicates (second run is not shown).

## 6. Results of the human topo II $\alpha$ cleavage assay

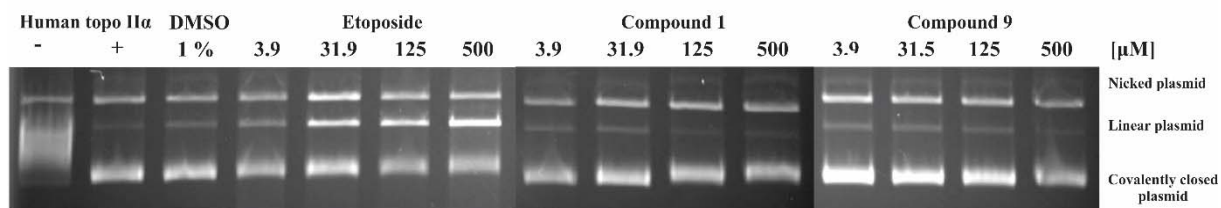

**Figure S7.** Results of the second run of the topoisomerase II $\alpha$  cleavage assay. The assay was performed at 4 different concentrations (3.9, 31.5, 125 and 500  $\mu$ M) of compound **1** and **9** and reference compound etoposide. Linear band was measured as a % of the total DNA, with 100% representing the amount of DNA in track 1 (DNA alone).

**Table S7.** % of linear DNA, determined in the cleavage assay for compounds **1** and **9** and etoposide at four concentrations (500, 125, 31.5 and 3.9  $\mu$ M).

| Compound                | % Linear | % Linear | % Linear Average |
|-------------------------|----------|----------|------------------|
| DNA alone               | 0        | 0        | 0                |
| DNA + topo II           | 55.5     | 4.08     | 4.81             |
| DNA + topo II + DMSO    | 7.45     | 8.77     | 8.11             |
| Etoposide 3.9 $\mu$ M   | 22.76    | 11.88    | 17.32            |
| Etoposide 31.5 $\mu$ M  | 33.00    | 36.26    | 34.63            |
| Etoposide 125 $\mu$ M   | 45.35    | 36.91    | 41.13            |
| Etoposide 500 $\mu$ M   | 43.03    | 48.40    | 45.71            |
| Compound 1 3.9 $\mu$ M  | 8.05     | 5.57     | 6.81             |
| Compound 1 31.5 $\mu$ M | 6.32     | 7.77     | 7.04             |
| Compound 1 125 $\mu$ M  | 3.02     | 2.85     | 2.94             |
| Compound 1 500 $\mu$ M  | 2.45     | 2.98     | 2.72             |
| Compound 9 3.9 $\mu$ M  | 5.49     | 7.03     | 6.26             |
| Compound 9 31.5 $\mu$ M | 7.77     | 6.75     | 7.26             |
| Compound 9 125 $\mu$ M  | 4.84     | 4.60     | 4.72             |
| Compound 9 500 $\mu$ M  | 2.95     | 2.25     | 2.60             |

## 7. Results of the human topo II $\alpha$ ATPase activity

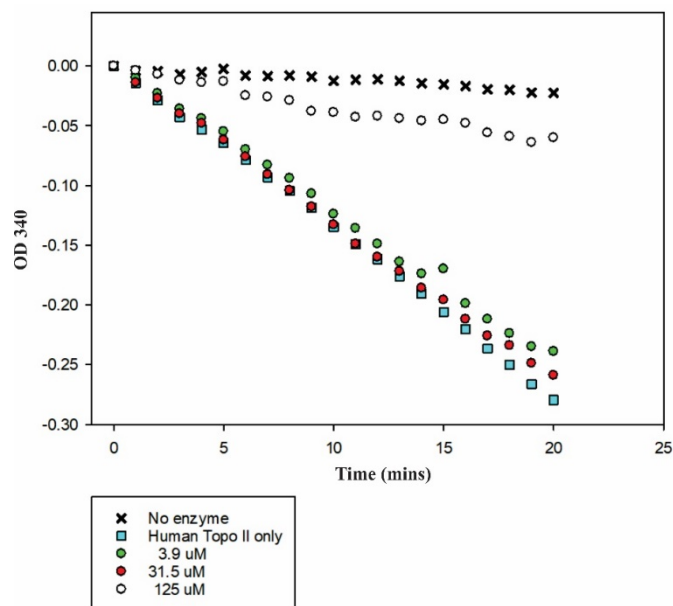

**Figure S8.** Results of the ATPase assay (second run) of compound **1**. It inhibited 85% of ATPase activity at 125  $\mu$ M. The reaction was performed at three concentrations (3.9, 31.5 and 125  $\mu$ M).

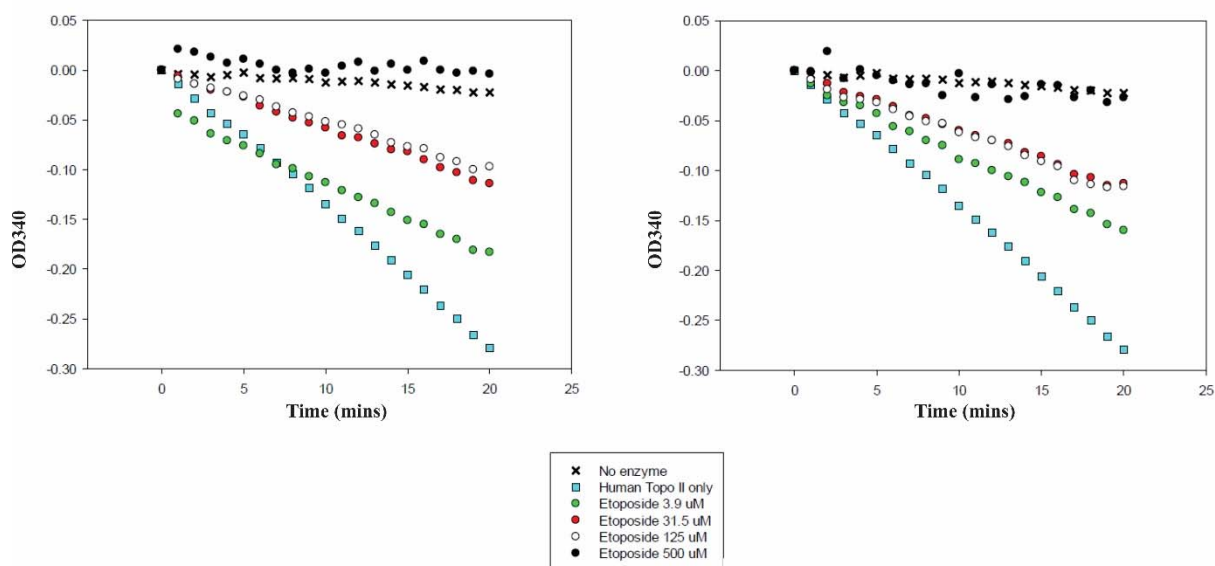

**Figure S9.** Results of the ATPase assay for etoposide (two runs). Results of the ATPase assay for the second run of compound **1**. The reaction was performed at four concentrations (3.9, 31.5, 125 and 500  $\mu$ M). Etoposide inhibited 70% (first run) or 63% (second run) of ATPase activity at 125  $\mu$ M.

**Table S8.** Results of the ATPase assay given as % activity which were calculated as follows: The spectrophotometer produces an output as change in OD340 with time. After 40 or 60 minutes the blank reading (no enzyme) was subtracted from the readings for each compound and divided by the positive reading (no inhibitor, 100% activity) minus the blank to give the percentage ATPase activity for each compound. There were solubility problems with compound **1** at 500  $\mu\text{M}$  (erratic readings). 2 negative controls and 5 positive controls were run along with a 10  $\mu\text{M}$  etoposide control.

|                                       | Rate ATPase activity ( $\mu\text{mol}/\text{min}$ ) |       |       |                                       |                                         |       |       |       |
|---------------------------------------|-----------------------------------------------------|-------|-------|---------------------------------------|-----------------------------------------|-------|-------|-------|
|                                       | Run 1                                               |       |       |                                       | Run 2                                   |       |       |       |
|                                       | No htII #1                                          |       | 0.26  | No htII #2                            |                                         | 0.21  |       |       |
|                                       | htII only #1                                        |       | 3.35  | htII only #2                          |                                         | 3.12  |       |       |
|                                       | htII only #3                                        |       | 3.33  | htII only #4                          |                                         | 3.14  |       |       |
|                                       | htII only #5                                        |       | 3.19  | + novobiocin 10 $\mu\text{M}$         |                                         | 0.14  |       |       |
|                                       | Average No htII                                     |       | 0.24  | Average htII only                     |                                         | 3.22  |       |       |
|                                       | Percentage ATPase activity of compounds             |       |       |                                       | Percentage ATPase activity of compounds |       |       |       |
| Concentration ( $\mu\text{M}$ ) Run 1 |                                                     |       |       | Concentration ( $\mu\text{M}$ ) Run 2 |                                         |       |       |       |
| Compound                              | 3.9                                                 | 31.5  | 125   | 500                                   | 3.9                                     | 31.5  | 125   | 500   |
| <b>Etoposide</b>                      | 52.71                                               | 36.43 | 30.23 | 0                                     | 51.94                                   | 37.21 | 37.21 | 4.65  |
| <b>Compound 1</b>                     | 92.25                                               | 96.12 | 24.81 | 65.12                                 | 88.37                                   | 94.57 | 16.28 | 36.43 |

## 8. Human topoisomerase II ATPase assays at different concentration of the ATP – Competitive ATPase assay

The spectrophotometer produces an output as change in OD340 with time (data not shown). The data from the runs after the addition of the ATP were plotted after adjusting the starting OD340 to zero. Lines are fitted to these by linear regression and the rates (OD change/min) calculated. The rates for each ATP and inhibitor concentration were then calculated as  $\mu\text{M}$  ATP hydrolysed/min using an extinction coefficient of  $6.22 \text{ M}^{-1} \text{ cm}^{-1}$  and a path length of 0.5 cm. The rates were then plotted against the ATP concentration and curves fitted to the data using the hyperbolic equation  $y=(ax/(b+x))$  where  $y = \text{rate}$ ,  $x = [\text{ATP}]$ ,  $a = V_{\text{max}}$  and  $b=K_m$ . Using the equation  $y=y_0+(ax/(b+x))$  it was possible to solve it and obtain values.

**Table S9:** The table shows the rates ( $\mu\text{M} /\text{min}$ ) at different compound and ATP concentrations after subtraction of the background rate and calculated  $K_m$  ( $\text{mM}$  ATP) and  $V_{\text{max}}$  ( $\mu\text{M}$  ATP/min) values. They were calculated from equation  $y = (ax / (b+x))$  where  $y = \text{rate}$ ,  $x = [\text{ATP}]$ ,  $a = V_{\text{max}}$ .

| <b>Rates for controls without enzyme in the presence of 2 mM ATP (<math>\mu\text{mol}/\text{min}</math>)</b>              |                                    |                                    |                                    |                                     |                                   |            |              |             |              |
|---------------------------------------------------------------------------------------------------------------------------|------------------------------------|------------------------------------|------------------------------------|-------------------------------------|-----------------------------------|------------|--------------|-------------|--------------|
| <b>100 <math>\mu\text{M}</math></b>                                                                                       | <b>75 <math>\mu\text{M}</math></b> | <b>50 <math>\mu\text{M}</math></b> | <b>31 <math>\mu\text{M}</math></b> | <b>3.9 <math>\mu\text{M}</math></b> | <b>0 <math>\mu\text{M}</math></b> |            |              |             |              |
| <b>1.125</b>                                                                                                              | <b>0.515</b>                       | <b>0.354</b>                       | <b>0.354</b>                       | <b>0.257</b>                        | <b>0.386</b>                      |            |              |             |              |
| <b>Rates (<math>\mu\text{mol}/\text{min}</math>) at different ATP concentrations (mM) after subtraction of background</b> |                                    |                                    |                                    |                                     |                                   |            |              |             |              |
| <b>[Cp 1] <math>\mu\text{M}</math></b>                                                                                    | <b>2</b>                           | <b>1</b>                           | <b>0.75</b>                        | <b>0.5</b>                          | <b>0.25</b>                       | <b>0.1</b> | <b>0.075</b> | <b>0.05</b> | <b>0.025</b> |
| <b>100</b>                                                                                                                | 0.772                              | 0.354                              | 0.289                              | 0.418                               | 0.064                             | 0.032      | 0.000        | 0.032       | 0.064        |
| <b>75</b>                                                                                                                 | 0.740                              | 0.354                              | 0.386                              | 0.322                               | 0.225                             | -<br>0.064 | -0.096       | 0.032       | 0.096        |
| <b>50</b>                                                                                                                 | 1.222                              | 0.772                              | 0.707                              | 0.450                               | 0.193                             | 0.032      | 0.129        | 0.096       | 0.000        |
| <b>31</b>                                                                                                                 | 1.286                              | 1.061                              | 0.868                              | 0.707                               | 0.450                             | 0.161      | 0.096        | -<br>0.032  | -0.129       |
| <b>3.9</b>                                                                                                                | 2.444                              | 1.897                              | 1.801                              | 1.479                               | 1.158                             | 0.450      | 0.354        | 0.257       | 0.064        |
| <b>0</b>                                                                                                                  | 2.990                              | 2.605                              | 2.508                              | 1.994                               | 1.350                             | 0.707      | 0.482        | 0.322       | 0.129        |
| <b>Calculated <math>K_m</math> (mM ATP) and <math>V_{\text{max}}</math> (<math>\mu\text{M}</math> ATP/min) values</b>     |                                    |                                    |                                    |                                     |                                   |            |              |             |              |
| <b>[Cp 1] <math>\mu\text{M}</math></b>                                                                                    | <b>100</b>                         | <b>75</b>                          | <b>50</b>                          | <b>31</b>                           | <b>3.9</b>                        | <b>0</b>   |              |             |              |
| <b><math>K_m</math></b>                                                                                                   | 6.14                               | 3.35                               | 2.5                                | 0.88                                | 0.49                              | 0.41       |              |             |              |
| <b><math>V_{\text{max}}</math></b>                                                                                        | 3.07                               | 1.94                               | 2.77                               | 1.9                                 | 2.97                              | 3.72       |              |             |              |

## 9. Cytotoxicity on MCF-7 and HepG2 cell lines using MTS assay

**Table S10.** Determined cytotoxicity of the substituted 4,5'-bithiazoles represented by EC<sub>50</sub> values and value ranges on HepG2 and MCF-7 cancer cell lines (24h vs. 72h).

| <b>Compound</b>  | EC <sub>50</sub> [ $\mu$ M]<br><b>MCF-7 (24h)</b> | EC <sub>50</sub> [ $\mu$ M]<br><b>MCF-7 (72h)</b> | EC <sub>50</sub> [ $\mu$ M]<br><b>HepG2 (24h)</b> | EC <sub>50</sub> [ $\mu$ M]<br><b>HepG2 (72h)</b> |
|------------------|---------------------------------------------------|---------------------------------------------------|---------------------------------------------------|---------------------------------------------------|
| <b>1</b>         | 65.0 (58.1-70.9)                                  | 59.5 (58.1-59.3)                                  | 72.8 (64.2-86.1)                                  | 46.8 (47.1-49.3)                                  |
| <b>7</b>         | 12.3 (10.4-14.9)                                  | 6.6 (4.6-7.6)                                     | 45.6 (32.8-53.7)                                  | 32.3 (29.7-37.2)                                  |
| <b>9</b>         | 15.0 (11.2-16.2)                                  | 13.8 (9.7-15.9)                                   | 73.5 (59.6-80.8)                                  | 23.5 (17.1-32.1)                                  |
| <b>10</b>        | 16.4 (14.6-17.0)                                  | 4.5 (3.4-5.9)                                     | 34.7 (31.5-38.9)                                  | 14.6 (12.7-19.5)                                  |
| <b>14</b>        | 32.3 (28.2-34.3)                                  | 7.5 (5.2-6.7)                                     | 47.7 (31.7-60.4)                                  | 28.2 (20.5-29.9)                                  |
| <b>Etoposide</b> | 320.2 (226.9-358.9)                               | 12.6 (10.1-15.9)                                  | 196.2 (169.4-201.5)                               | 25.8 (15.1-35.3)                                  |

## 10. Investigation of the effect of 4,5'-bithiazoles on the cell cycle and cell proliferation

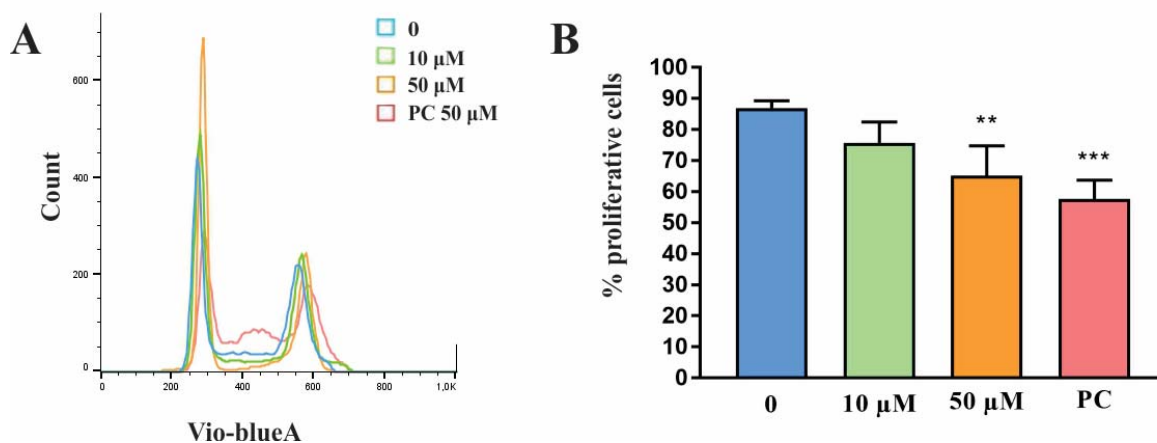

**Figure S10.** A) Representative histograms for non-labelled cells, vehicle control (0), compound **1** at 10  $\mu\text{M}$  and 50  $\mu\text{M}$  and etoposide at 50  $\mu\text{M}$  for cell cycle analysis. (B) Percent of proliferative cells after 24h treatment to compound **1** at 50  $\mu\text{M}$  and 10  $\mu\text{M}$  determined with the Ki67 antibody (\*\*  $p < 0.01$  and \*\*\*  $p < 0.001$ ).

**Table S11.** Results of cell cycle analysis for compound **1**. Experiments were performed in 3 independent measurements and SD values were calculated. Significant differences between the vehicle control (0) and treated cells (compound **1**) as well as PC (etoposide; 50  $\mu\text{M}$ ) were calculated using ANOVA (\*  $p < 0.05$ , \*\*  $p < 0.01$  and \*\*\*  $p < 0.001$ ).

| Compound | 0              | 1 (10 $\mu\text{M}$ ) | 1 (50 $\mu\text{M}$ ) | PC                |
|----------|----------------|-----------------------|-----------------------|-------------------|
| G1       | 46.7 $\pm$ 4.6 | 56.5 $\pm$ 6.4        | 60.6 $\pm$ 7.0*       | 33.1 $\pm$ 2.4*   |
| S        | 25.9 $\pm$ 3.3 | 17.5 $\pm$ 1.1***     | 11.8 $\pm$ 4.5**      | 44.0 $\pm$ 1.5*** |
| G2       | 25.4 $\pm$ 4.9 | 24.8 $\pm$ 4.5        | 26.2 $\pm$ 2.5        | 22.9 $\pm$ 3.5    |
| >G1, G2< | 2 $\pm$ 1.1    | 1.2 $\pm$ 1.0         | 1.4 $\pm$ 0.6         | 0                 |



## 11. NMR, HR-MS, elemental analysis and HPLC purity of active compounds

- 1) The HR-MS analysis were performed at the Centre for Mass spectroscopy, Josef Stefan Institute, Ljubljana.
- 2) The <sup>1</sup>H-NMR spectra were supplied by vendors.
- 3) Elemental analysis was performed at the National Institute of Chemistry, Ljubljana using Perkin-Elmer C, H, N, S analyser.
- 4) HPLC purity measurements were performed at National Institute of Chemistry Slovenia

### Compound 1

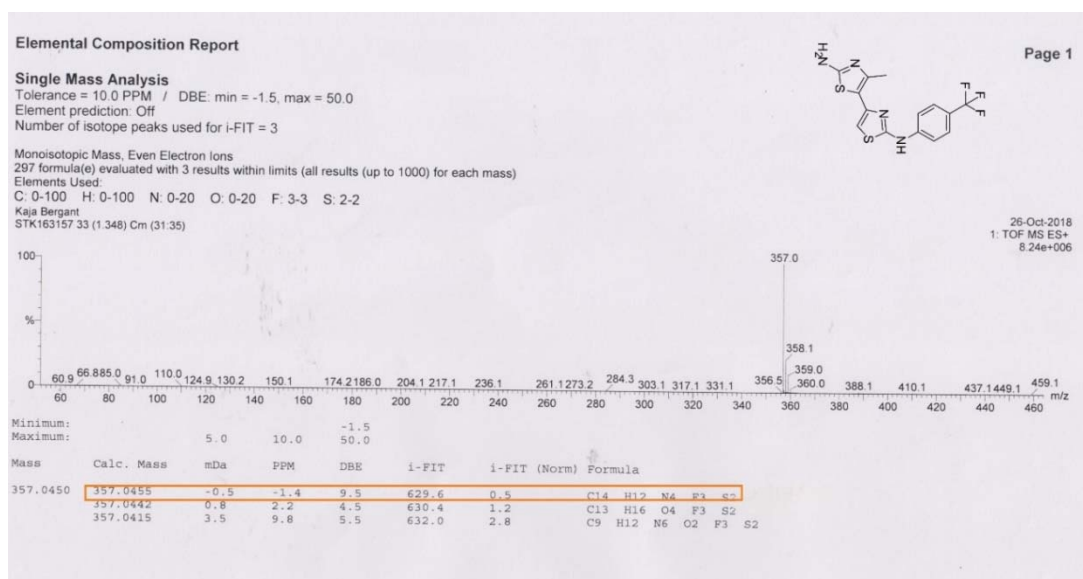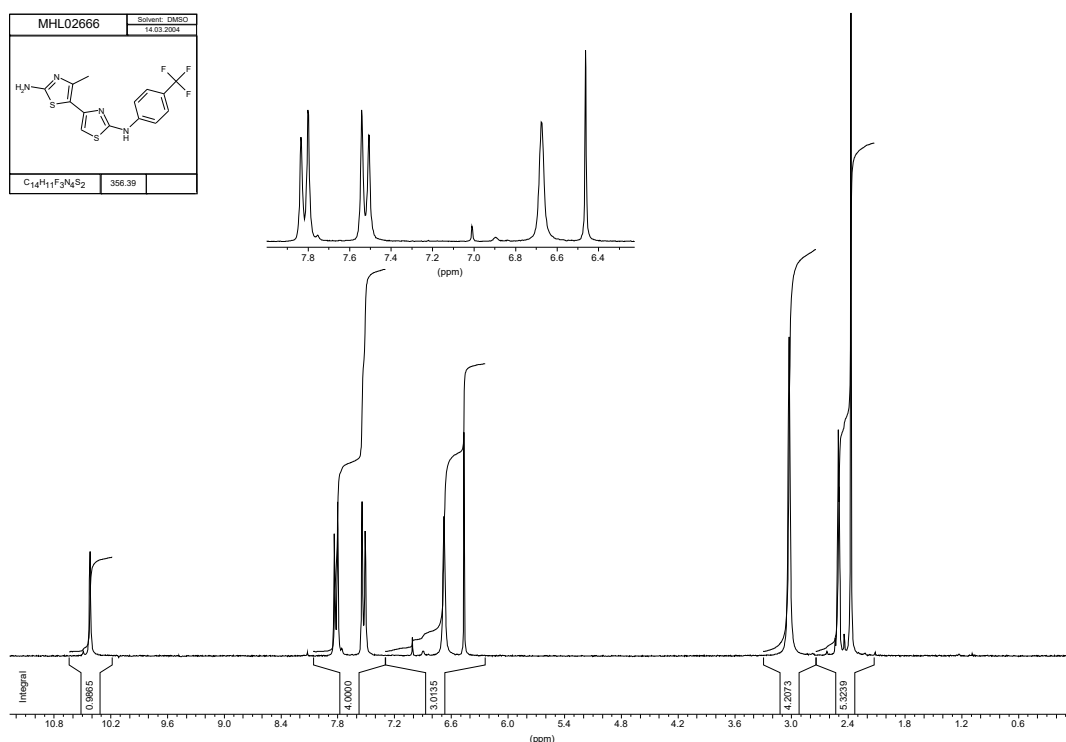

# Compound 2

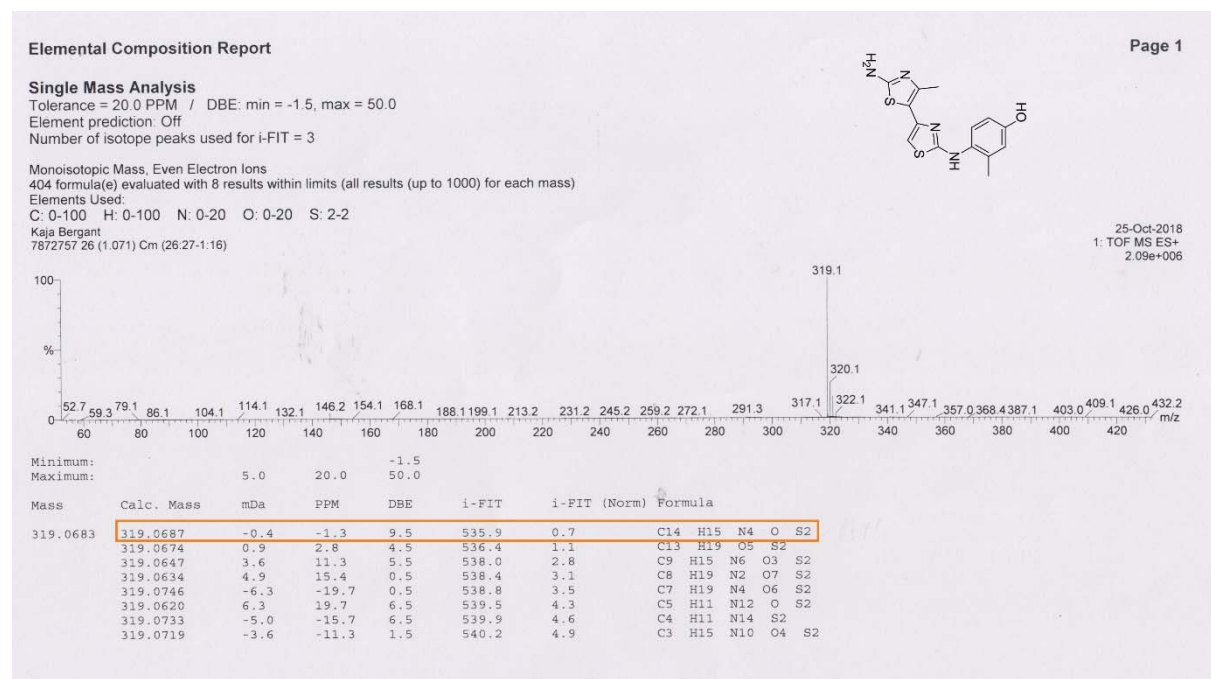

B0411948 DMSO-d6/CCL4=2:1 Dsh

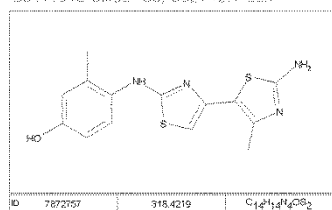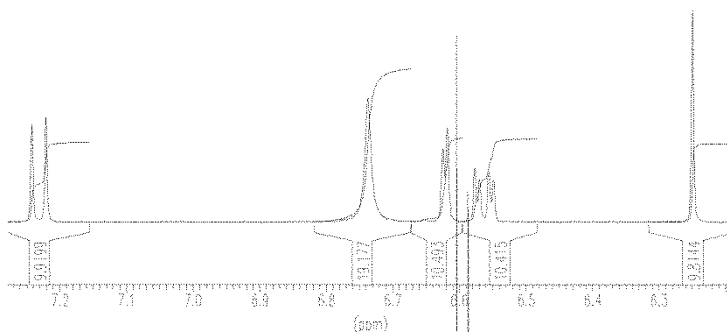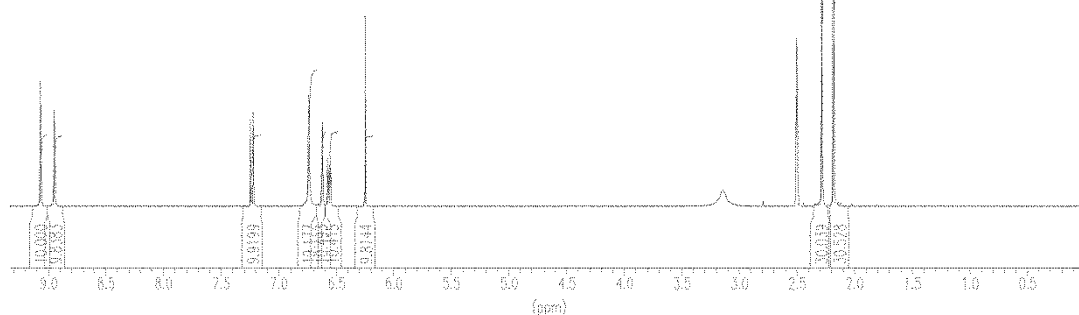

# Compound 3

## Elemental Composition Report

### Single Mass Analysis

Tolerance = 20.0 PPM / DBE: min = -1.5, max = 50.0  
 Element prediction: Off  
 Number of isotope peaks used for i-FIT = 3

Monoisotopic Mass, Even Electron Ions  
 455 formula(e) evaluated with 9 results within limits (all results (up to 1000) for each mass)

Elements Used:

C: 0-100 H: 0-100 N: 0-20 O: 0-20 S: 2-2

Kaja Bergant  
 7858097 50 (2.031) Cm (50-2.22)

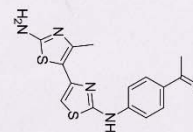

Page 1

25-Oct-2018  
 1: TOF MS ES+  
 5.74e+005

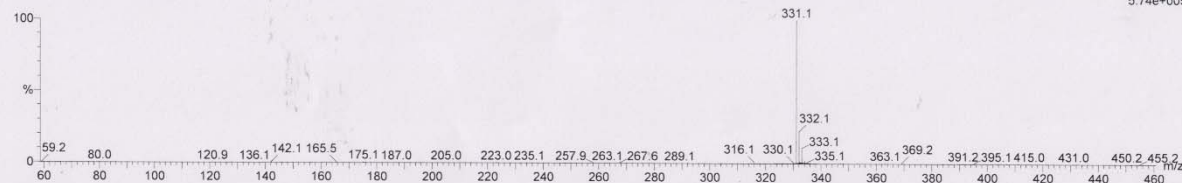

Minimum:

Maximum:

| Mass     | Calc. Mass | mDa  | PPM   | DBE  | i-FIT | i-FIT (Norm) | Formula          |
|----------|------------|------|-------|------|-------|--------------|------------------|
| 331.0685 | 331.0687   | -0.2 | -0.6  | 10.5 | 494.1 | 0.1          | C15 H15 N4 O S2  |
|          | 331.0674   | 1.1  | 3.3   | 5.5  | 497.2 | 3.1          | C14 H19 O5 S2    |
|          | 331.0647   | 3.8  | 11.5  | 6.5  | 499.0 | 4.9          | C10 H15 N6 O3 S2 |
|          | 331.0634   | 5.1  | 15.4  | 1.5  | 500.2 | 6.2          | C9 H19 N2 O7 S2  |
|          | 331.0746   | -6.1 | -18.4 | 1.5  | 500.6 | 6.5          | C8 H19 N4 O6 S2  |
|          | 331.0620   | 6.5  | 19.6  | 7.5  | 501.1 | 7.0          | C6 H11 N12 O S2  |
|          | 331.0733   | -4.8 | -14.5 | 7.5  | 501.4 | 7.3          | C5 H11 N14 S2    |
|          | 331.0719   | -3.4 | -10.3 | 2.5  | 502.5 | 8.4          | C4 H15 N10 O4 S2 |
|          | 331.0692   | -0.7 | -2.1  | 3.5  | 504.8 | 10.8         | H11 N16 O2 S2    |

B0411622 DMSO-D6/CCl4=2:1 Dah

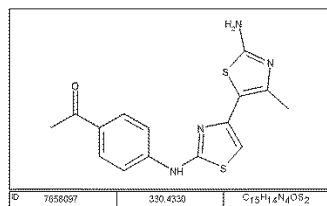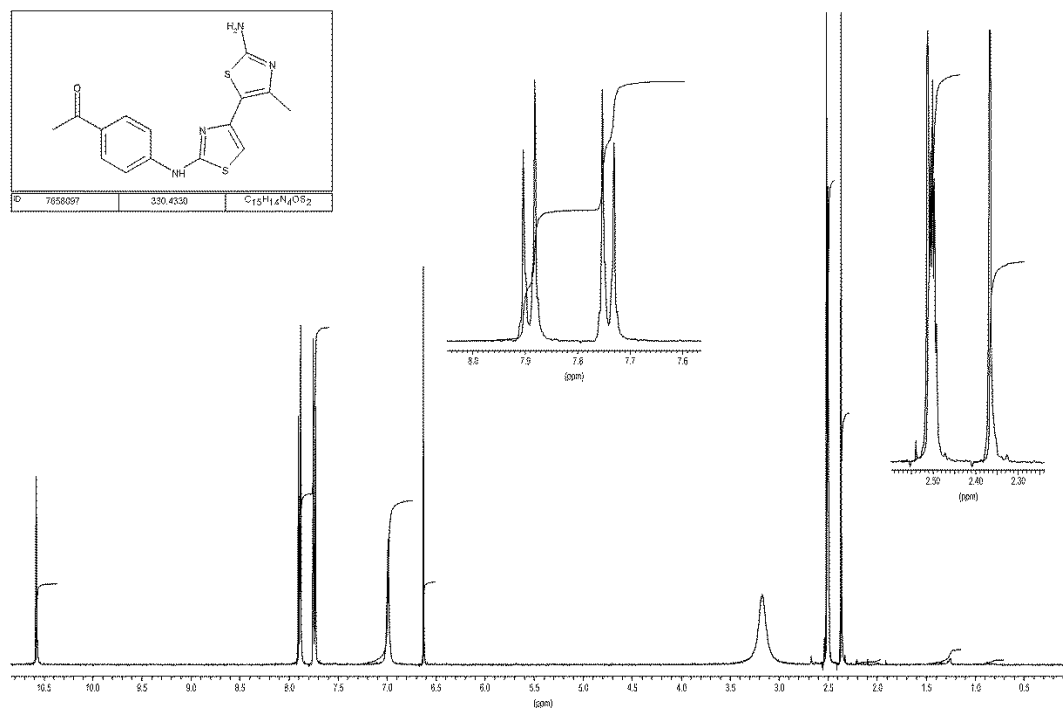

# Compound 4

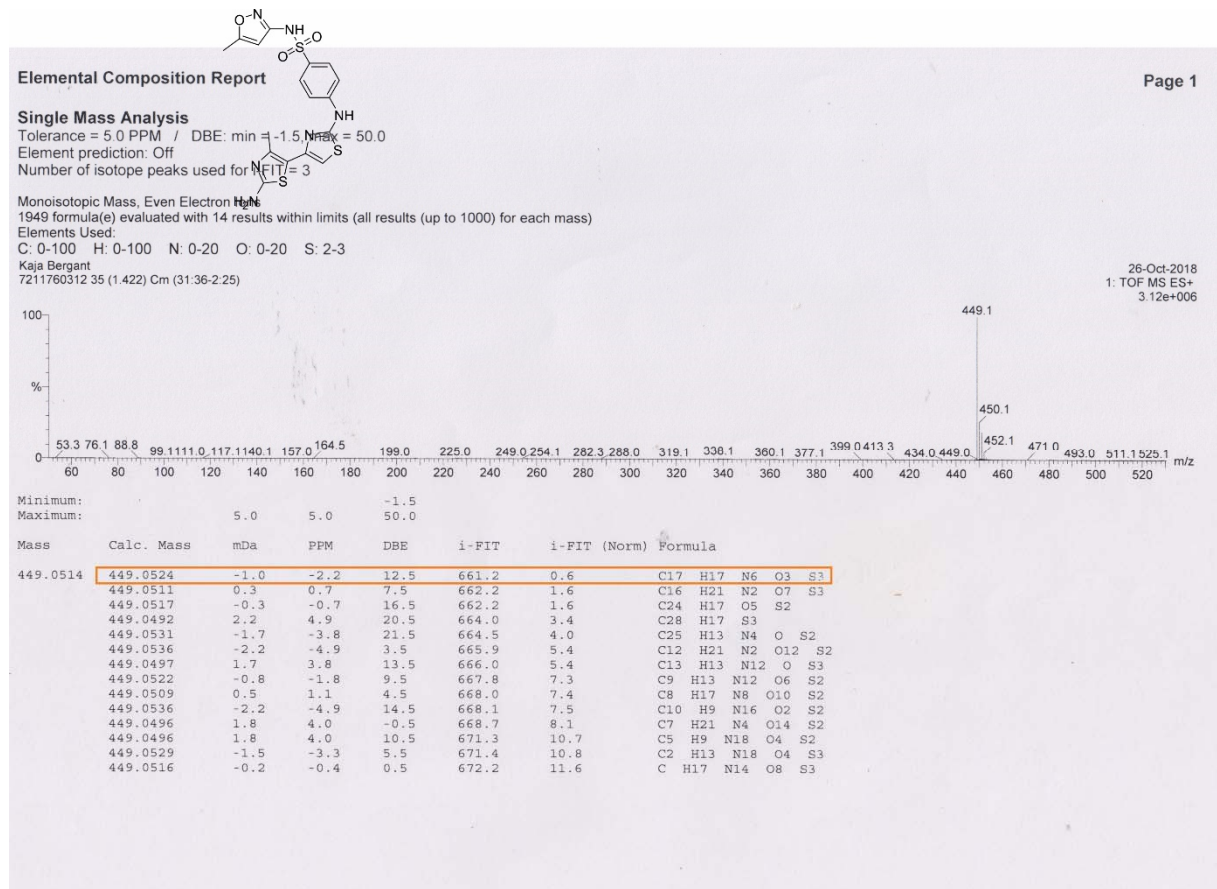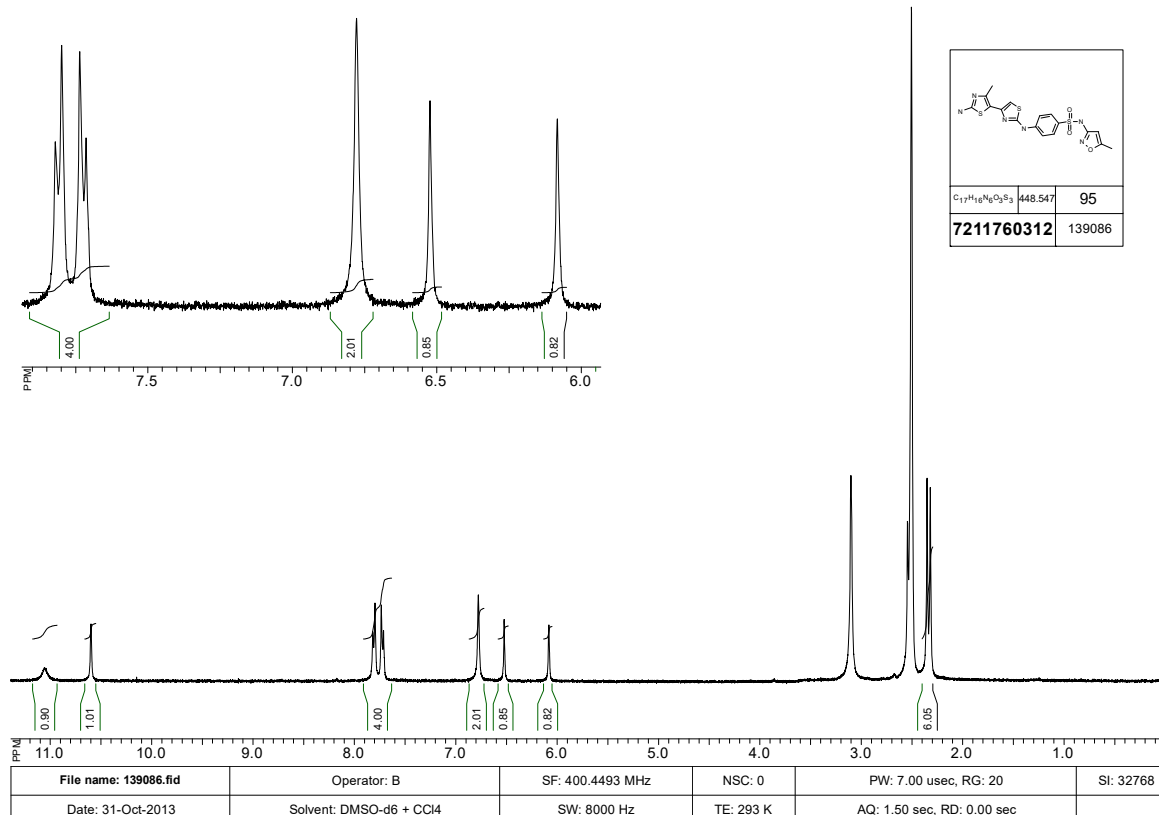

# Compound 5

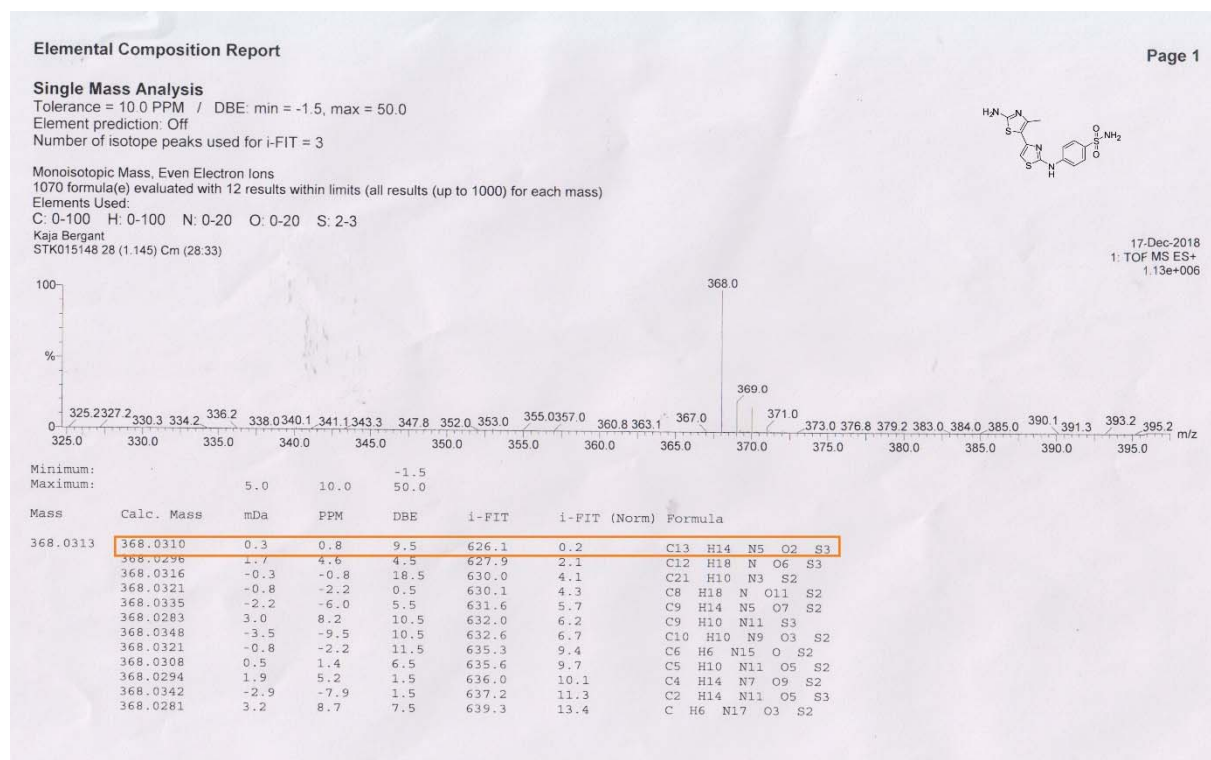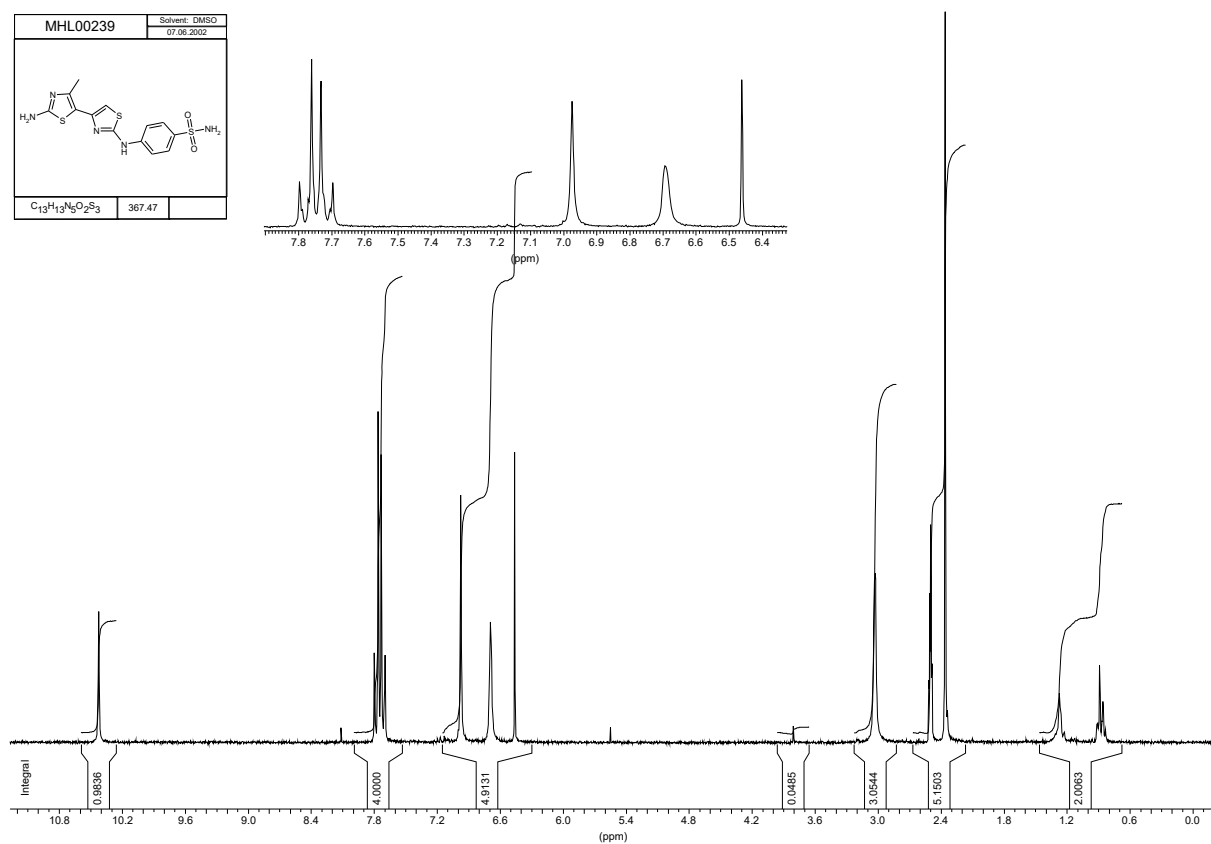

# Compound 6

## Elemental Composition Report

Page 1

### Single Mass Analysis

Tolerance = 10.0 PPM / DBE: min = -1.5, max = 50.0

Element prediction: Off

Number of isotope peaks used for i-FIT = 3

Monoisotopic Mass, Even Electron Ions

524 formula(e) evaluated with 6 results within limits (all results (up to 1000) for each mass)

Elements Used:

C: 0-100 H: 0-100 N: 0-20 O: 0-40 S: 2-2

Kaja Bergant

7859208 21 (0.868) Cm (20:21:4:8)

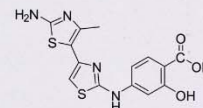

1: TOF MS ES-  
8.48e+003

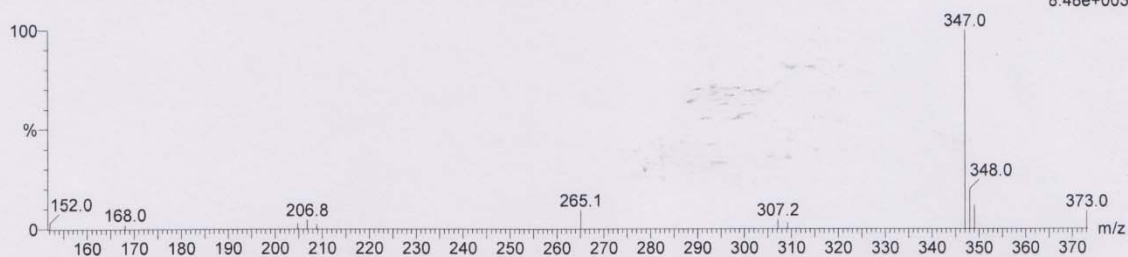

Minimum: -1.5  
Maximum: 10.0 10.0 50.0

| Mass     | Calc. Mass | mDa  | PPM  | DBE  | i-FIT | i-FIT (Norm) | Formula          |
|----------|------------|------|------|------|-------|--------------|------------------|
| 347.0272 | 347.0273   | -0.1 | -0.3 | 11.5 | 12.5  | 0.0          | C14 H11 N4 O3 S2 |
|          | 347.0259   | 1.3  | 3.7  | 6.5  | 16.2  | 3.8          | C13 H15 O7 S2    |
|          | 347.0246   | 2.6  | 7.5  | 12.5 | 18.1  | 5.6          | C10 H7 N10 O S2  |
|          | 347.0304   | -3.2 | -9.2 | 3.5  | 23.1  | 10.6         | C3 H11 N10 O6 S2 |
|          | 347.0291   | -1.9 | -5.5 | -1.5 | 23.6  | 11.2         | C2 H15 N6 O10 S2 |
|          | 347.0291   | -1.9 | -5.5 | 9.5  | 24.5  | 12.1         | H3 N20 S2        |

B9411623 DMSO-D6/CCL4=2:1 Dsh

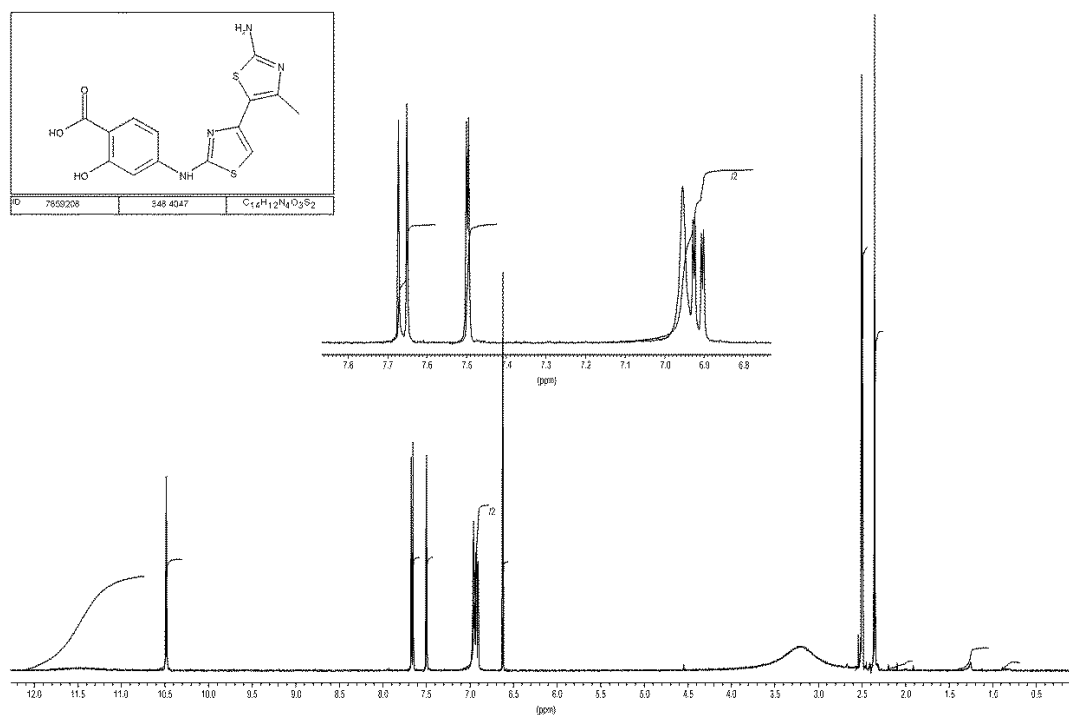

# Compound 7

## Elemental Composition Report

### Single Mass Analysis

Tolerance = 10.0 PPM / DBE: min = -1.5, max = 50.0  
 Element prediction: Off  
 Number of isotope peaks used for i-FIT = 3

Monoisotopic Mass, Even Electron Ions  
 524 formula(e) evaluated with 5 results within limits (all results (up to 1000) for each mass)  
 Elements Used:

C: 0-100 H: 0-100 N: 0-20 O: 0-20 S: 2-2  
 Kaja Bergant  
 5936031.26 (1.072) Cm (25.26-2.20)

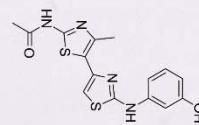

Page 1

25-Oct-2018  
 1: TOF MS ES+  
 1.51e+006

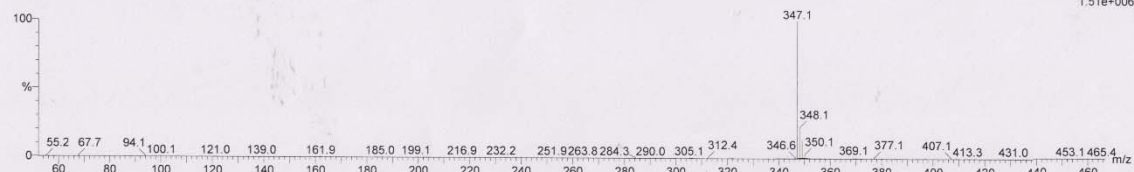

Minimum:  
 Maximum:

| Mass     | Calc. Mass | mDa  | PPM  | DBE  | i-FIT | i-FIT (Norm) | Formula          |
|----------|------------|------|------|------|-------|--------------|------------------|
| 347.0630 | 347.0636   | -0.6 | -1.7 | 10.5 | 559.6 | 0.3          | C15 H15 N4 O2 S2 |
|          | 347.0623   | 0.7  | 2.0  | 5.5  | 560.7 | 1.5          | C14 H19 O6 S2    |
|          | 347.0610   | 2.0  | 5.8  | 11.5 | 563.4 | 4.1          | C11 H11 N10 S2   |
|          | 347.0596   | 3.4  | 9.8  | 6.5  | 564.4 | 5.1          | C10 H15 N6 O4 S2 |
|          | 347.0641   | -1.1 | -3.2 | 3.5  | 570.2 | 10.9         | H11 N16 O3 S2    |

B07-94

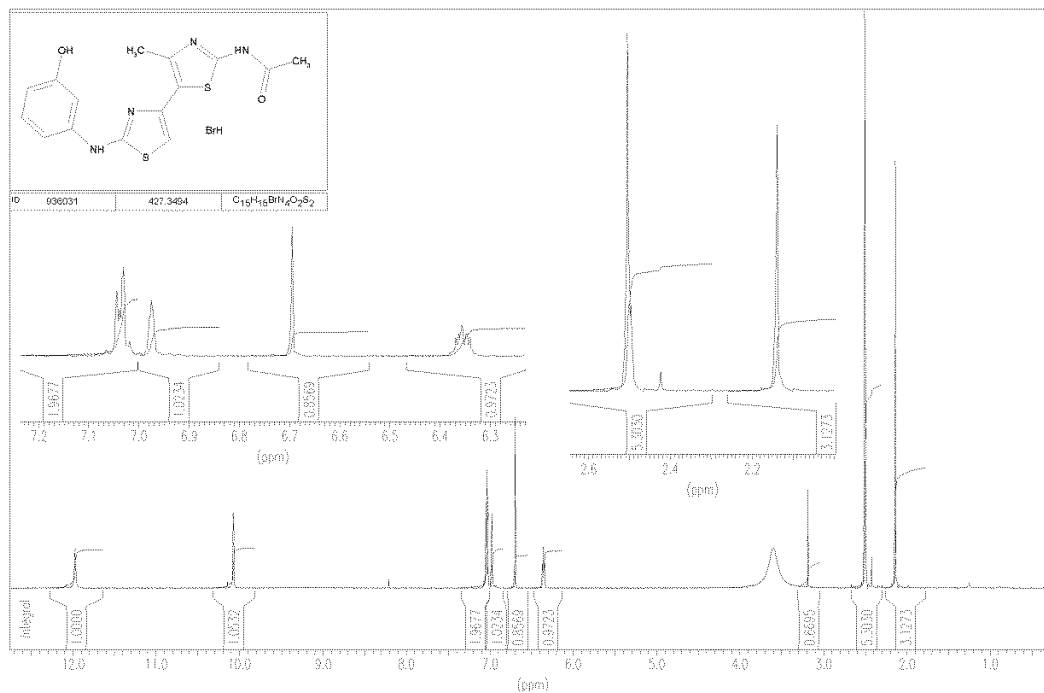

h

# Compound 8

## Elemental Composition Report

Page 1

### Single Mass Analysis

Tolerance = 10.0 PPM / DBE: min = -1.5, max = 50.0

Element prediction: Off

Number of isotope peaks used for i-FIT = 3

Monoisotopic Mass, Even Electron Ions

650 formula(e) evaluated with 8 results within limits (all results (up to 1000) for each mass)

Elements Used:

C: 0-100 H: 0-100 N: 0-20 O: 0-40 S: 2-2

Kaja Bergant

5934630 34 (1.385) Cm (33:35-6:15)

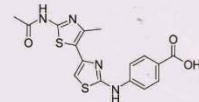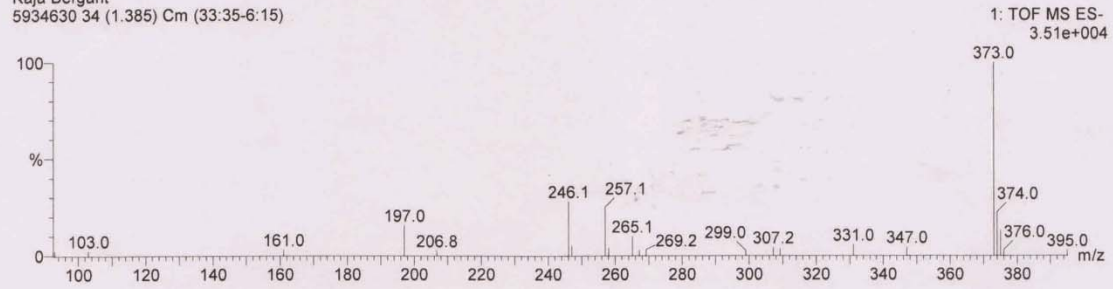

Minimum: -1.5  
Maximum: 10.0 10.0 50.0

| Mass     | Calc. Mass | mDa  | PPM  | DBE  | i-FIT | i-FIT (Norm) | Formula          |
|----------|------------|------|------|------|-------|--------------|------------------|
| 373.0420 | 373.0429   | -0.9 | -2.4 | 12.5 | 20.9  | 0.2          | C16 H13 N4 O3 S2 |
|          | 373.0416   | 0.4  | 1.1  | 7.5  | 22.7  | 1.9          | C15 H17 O7 S2    |
|          | 373.0402   | 1.8  | 4.8  | 13.5 | 24.4  | 3.7          | C12 H9 N10 O S2  |
|          | 373.0389   | 3.1  | 8.3  | 8.5  | 25.6  | 4.8          | C11 H13 N6 O5 S2 |
|          | 373.0448   | -2.8 | -7.5 | -0.5 | 29.1  | 8.3          | C4 H17 N6 O10 S2 |
|          | 373.0447   | -2.7 | -7.2 | 10.5 | 29.6  | 8.9          | C2 H5 N20 S2     |
|          | 373.0434   | -1.4 | -3.8 | 5.5  | 30.3  | 9.6          | C H9 N16 O4 S2   |
|          | 373.0421   | -0.1 | -0.3 | 0.5  | 31.0  | 10.3         | H13 N12 O8 S2    |

b14-69

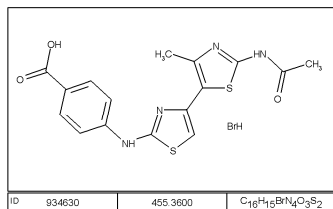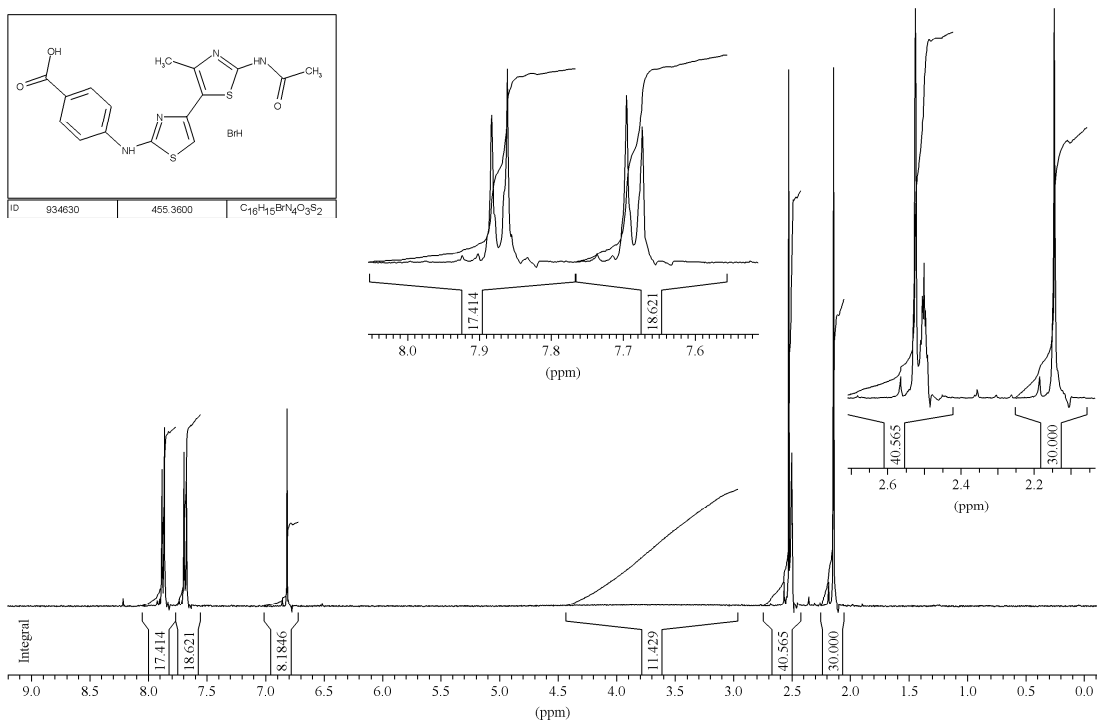



# Compound 9

## Elemental Composition Report

### Single Mass Analysis

Tolerance = 10.0 PPM / DBE: min = -1.5, max = 50.0  
 Element prediction: Off  
 Number of isotope peaks used for i-FIT = 3

Monoisotopic Mass, Even Electron Ions

710 formula(e) evaluated with 8 results within limits (all results (up to 1000) for each mass)

Elements Used:

C: 0-100 H: 0-100 N: 0-20 O: 0-20 S: 2-2

Kaja Bergant

5835030 40 (1.625) Cm (40-9:24)

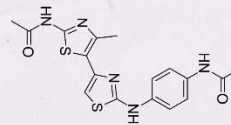

Page 1

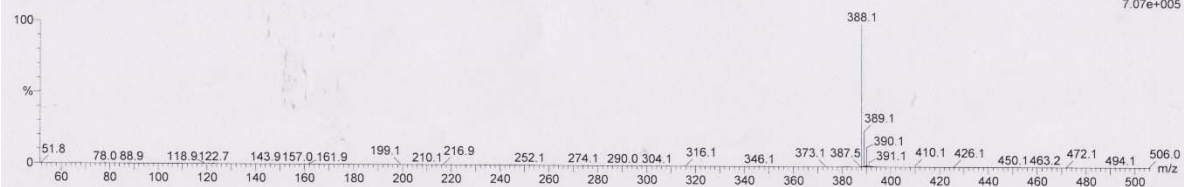

26-Oct-2018  
 1: TOF MS ES+  
 7.07e+005

Minimum:

Maximum:

Mass

| Mass     | Calc. Mass | mDa  | PPM  | DBE  | i-FIT | i-FIT (Norm) | Formula          |
|----------|------------|------|------|------|-------|--------------|------------------|
| 388.0907 | 388.0902   | 0.5  | 1.3  | 11.5 | 398.5 | 0.6          | C17 H18 N5 O2 S2 |
|          | 388.0942   | -3.5 | -9.0 | 15.5 | 399.0 | 1.0          | C22 H18 N3 S2    |
|          | 388.0889   | 1.8  | 4.6  | 6.5  | 400.5 | 2.6          | C16 H22 N O6 S2  |
|          | 388.0875   | 3.2  | 8.2  | 12.5 | 403.4 | 5.5          | C13 H14 N11 S2   |
|          | 388.0934   | -2.7 | -7.0 | 3.5  | 407.3 | 9.3          | C6 H18 N11 O5 S2 |
|          | 388.0920   | -1.3 | -3.3 | 1.5  | 407.4 | 9.5          | C5 H22 N7 O9 S2  |
|          | 388.0907   | 0.0  | 0.0  | 4.5  | 409.7 | 11.8         | C2 H14 N17 O3 S2 |
|          | 388.0894   | 1.3  | 3.3  | -0.5 | 410.4 | 12.5         | C H18 N13 O7 S2  |

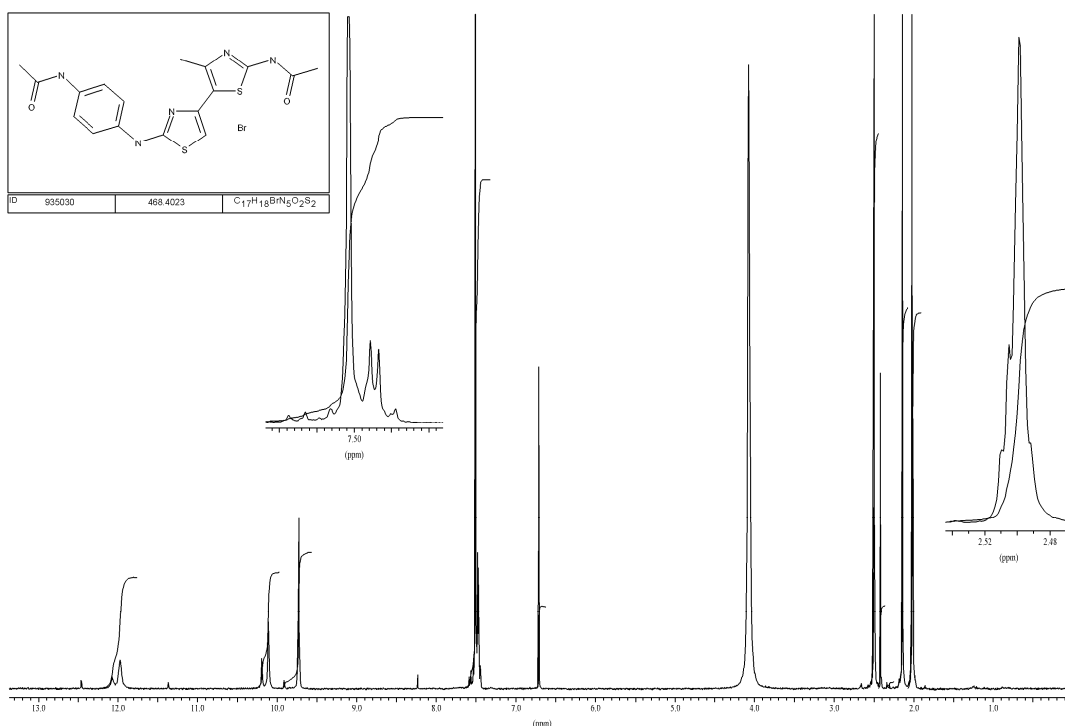

# Compound 10

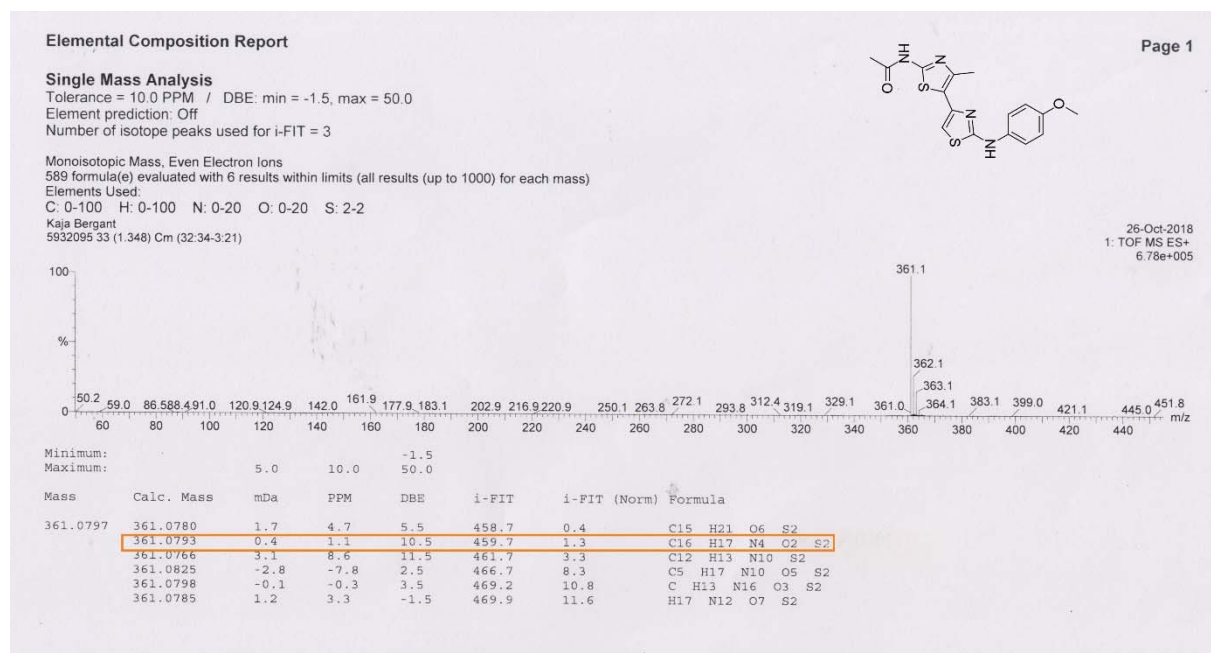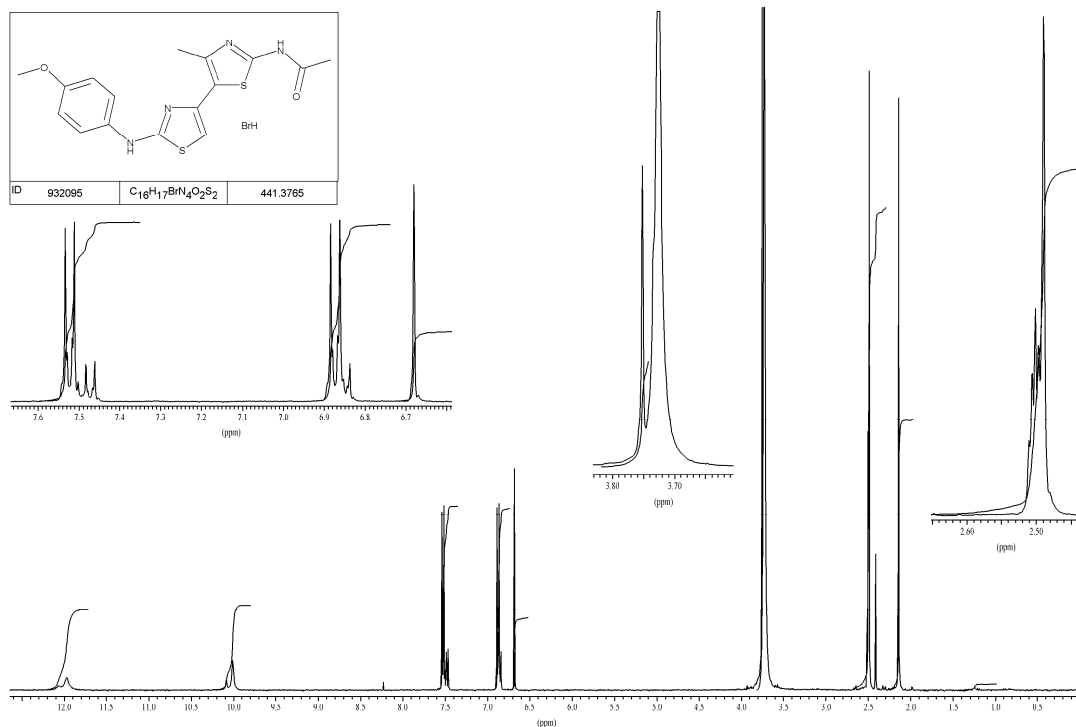

# Compound 11

## Elemental Composition Report

Page 1

### Single Mass Analysis

Tolerance = 10.0 PPM / DBE: min = -1.5, max = 50.0

Element prediction: Off

Number of isotope peaks used for i-FIT = 3

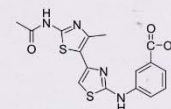

Monoisotopic Mass, Even Electron Ions

661 formula(e) evaluated with 9 results within limits (all results (up to 1000) for each mass)

Elements Used:

C: 0-100 H: 0-100 N: 0-20 O: 0-40 S: 2-2

Kaja Bergant

STK070262 37 (1.514) Cm (36:38-22:30)

1: TOF MS ES+  
5.15e+004

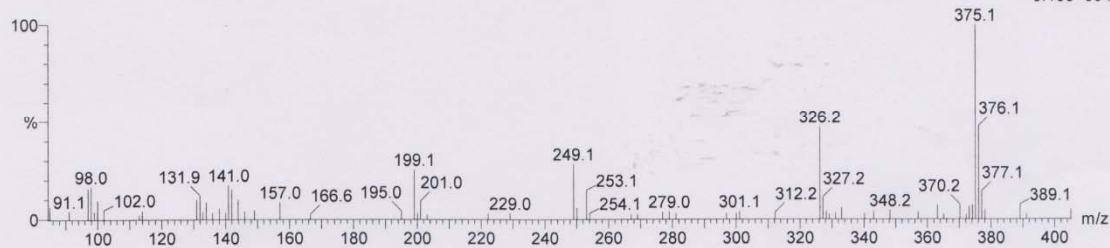

Minimum:

Maximum: 10.0 10.0 -1.5

| Mass     | Calc. Mass | mDa  | PPM  | DBE  | i-FIT | i-FIT (Norm) | Formula          |
|----------|------------|------|------|------|-------|--------------|------------------|
| 375.0581 | 375.0586   | -0.5 | -1.3 | 11.5 | 29.3  | 0.8          | C16 H15 N4 O3 S2 |
|          | 375.0572   | 0.9  | 2.4  | 6.5  | 29.7  | 1.2          | C15 H19 O7 S2    |
|          | 375.0559   | 2.2  | 5.9  | 12.5 | 31.0  | 2.5          | C12 H11 N10 O S2 |
|          | 375.0545   | 3.6  | 9.6  | 7.5  | 31.4  | 2.9          | C11 H15 N6 O5 S2 |
|          | 375.0617   | -3.6 | -9.6 | 3.5  | 31.7  | 3.2          | C5 H15 N10 O6 S2 |
|          | 375.0604   | -2.3 | -6.1 | -1.5 | 31.9  | 3.4          | C4 H19 N6 O10 S2 |
|          | 375.0604   | -2.3 | -6.1 | 9.5  | 33.3  | 4.8          | C2 H7 N20 S2     |
|          | 375.0591   | -1.0 | -2.7 | 4.5  | 33.8  | 5.3          | C H11 N16 O4 S2  |
|          | 375.0577   | 0.4  | 1.1  | -0.5 | 34.3  | 5.8          | H15 N12 O8 S2    |

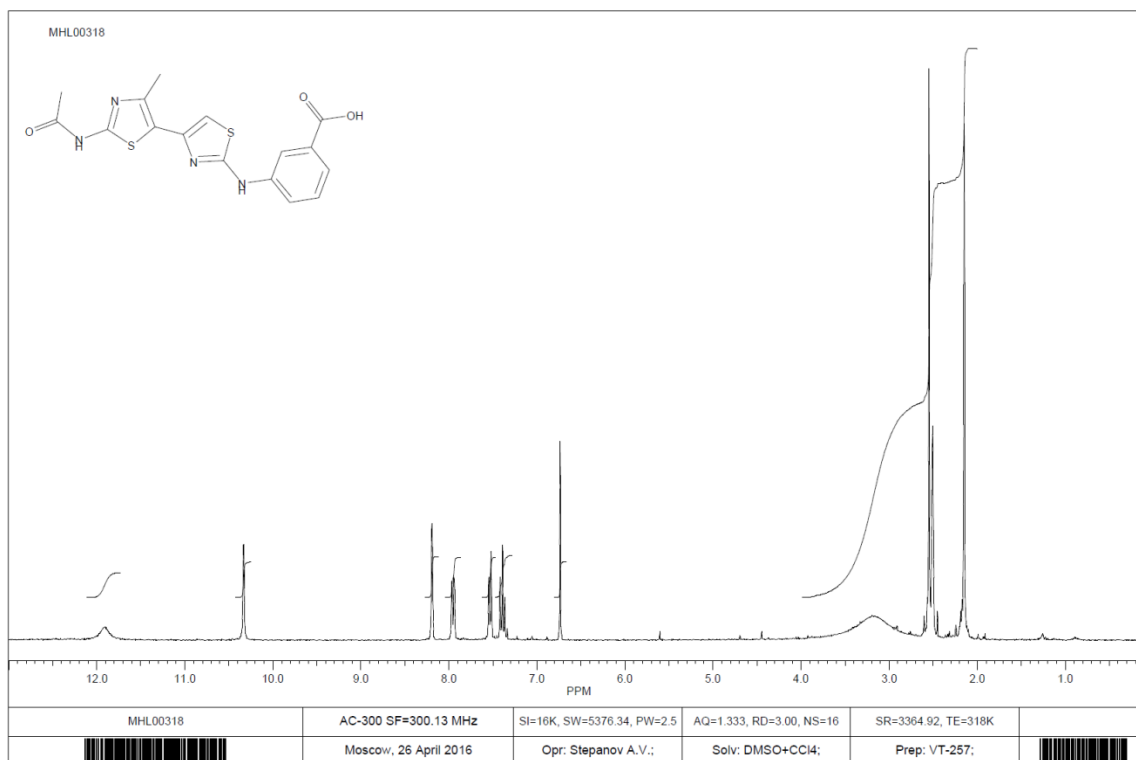

# Compound 12

## Elemental Composition Report

Page 1

### Single Mass Analysis

Tolerance = 10.0 PPM / DBE: min = -1.5, max = 50.0

Element prediction: Off

Number of isotope peaks used for i-FIT = 3

Monoisotopic Mass, Even Electron Ions

515 formula(e) evaluated with 7 results within limits (all results (up to 1000) for each mass)

Elements Used:

C: 0-100 H: 0-100 N: 0-20 O: 0-40 S: 2-2

Kaja Bergant

5932282 43 (1.754) Cm (43:45-66:81)

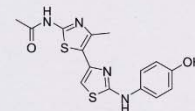

1: TOF MS ES-  
1.32e+004

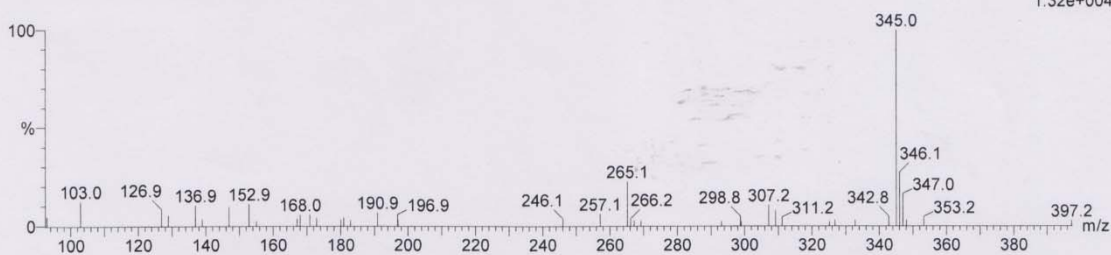

Minimum: -1.5  
Maximum: 10.0 10.0 50.0

| Mass     | Calc. Mass | mDa  | PPM  | DBE  | i-FIT | i-FIT (Norm) | Formula          |
|----------|------------|------|------|------|-------|--------------|------------------|
| 345.0486 | 345.0520   | -3.4 | -9.9 | 15.5 | 24.8  | 0.3          | C20 H13 N2 S2    |
|          | 345.0480   | 0.6  | 1.7  | 11.5 | 26.6  | 2.0          | C15 H13 N4 O2 S2 |
|          | 345.0467   | 1.9  | 5.5  | 6.5  | 27.1  | 2.6          | C14 H17 O6 S2    |
|          | 345.0453   | 3.3  | 9.6  | 12.5 | 27.8  | 3.3          | C11 H9 N10 S2    |
|          | 345.0512   | -2.6 | -7.5 | 3.5  | 30.1  | 5.6          | C4 H13 N10 O5 S2 |
|          | 345.0498   | -1.2 | -3.5 | -1.5 | 30.4  | 5.9          | C3 H17 N6 O9 S2  |
|          | 345.0485   | 0.1  | 0.3  | 4.5  | 31.2  | 6.7          | H9 N16 O3 S2     |

60454404 DMSO-d6/CCL4 Dsh

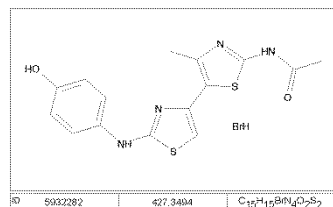

ID 5932282 427.3404 C<sub>15</sub>H<sub>13</sub>N<sub>4</sub>O<sub>2</sub>S<sub>2</sub>

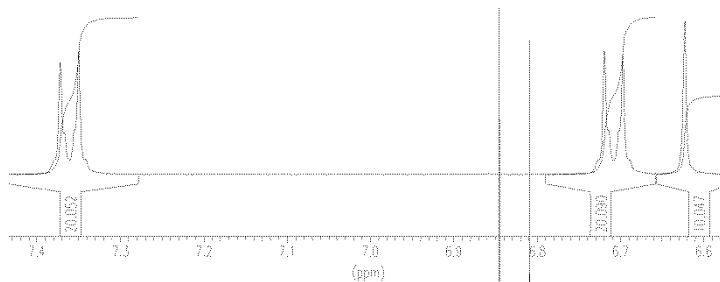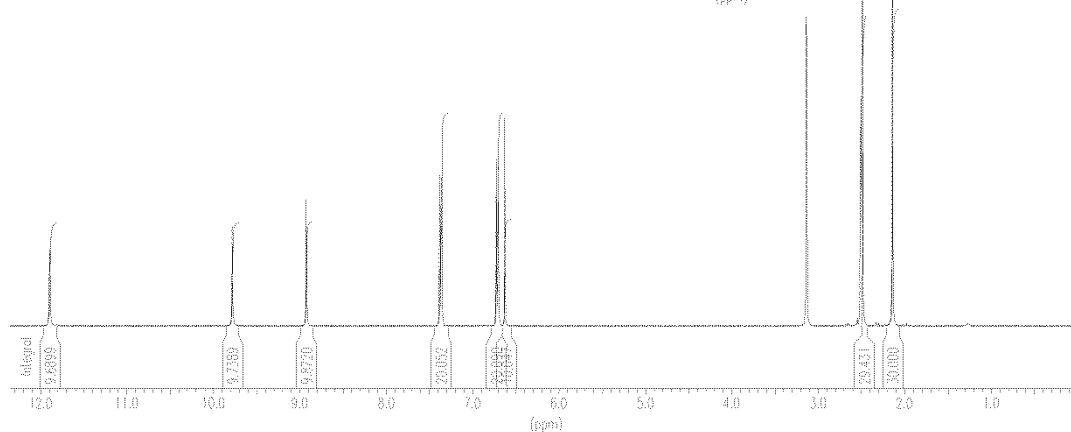

# Compound 13

## Elemental Composition Report

Page 1

### Single Mass Analysis

Tolerance = 10.0 PPM / DBE: min = -1.5, max = 50.0

Element prediction: Off

Number of isotope peaks used for i-FIT = 3

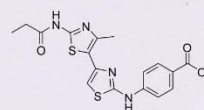

Monoisotopic Mass, Even Electron Ions

724 formula(e) evaluated with 9 results within limits (all results (up to 1000) for each mass)

Elements Used:

C: 0-100 H: 0-100 N: 0-20 O: 0-40 S: 2-2

Kaja Bergant

5935989 33 (1.348) Cm (32:34-11:17)

1: TOF MS ES-  
9.44e+003

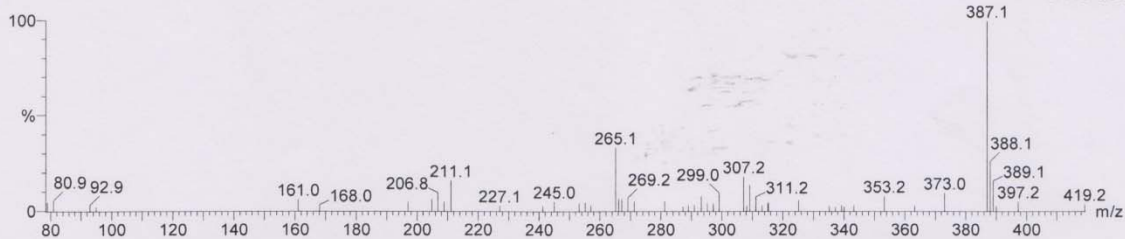

Minimum:

Maximum: 10.0 10.0 -1.5

| Mass     | Calc. Mass | mDa  | PPM  | DBE  | i-FIT | i-FIT (Norm) | Formula          |
|----------|------------|------|------|------|-------|--------------|------------------|
| 387.0589 | 387.0626   | -3.7 | -9.6 | 16.5 | 19.7  | 0.4          | C22 H15 N2 O S2  |
|          | 387.0586   | 0.3  | 0.8  | 12.5 | 20.9  | 1.6          | C17 H15 N4 O3 S2 |
|          | 387.0572   | 1.7  | 4.4  | 7.5  | 21.5  | 2.2          | C16 H19 O7 S2    |
|          | 387.0559   | 3.0  | 7.8  | 13.5 | 22.8  | 3.5          | C13 H11 N10 O S2 |
|          | 387.0617   | -2.8 | -7.2 | 4.5  | 25.6  | 6.3          | C6 H15 N10 O6 S2 |
|          | 387.0604   | -1.5 | -3.9 | -0.5 | 25.9  | 6.6          | C5 H19 N6 O10 S2 |
|          | 387.0604   | -1.5 | -3.9 | 10.5 | 26.5  | 7.2          | C3 H7 N20 S2     |
|          | 387.0591   | -0.2 | -0.5 | 5.5  | 26.9  | 7.6          | C2 H11 N16 O4 S2 |
|          | 387.0577   | 1.2  | 3.1  | 0.5  | 27.3  | 8.0          | C H15 N12 O8 S2  |

5935989G1

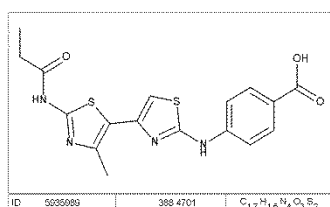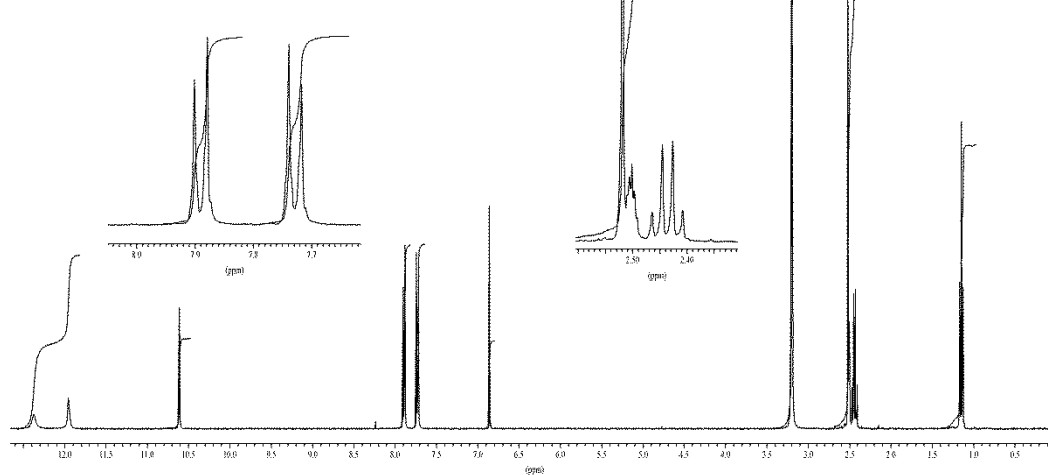

# Compound 14

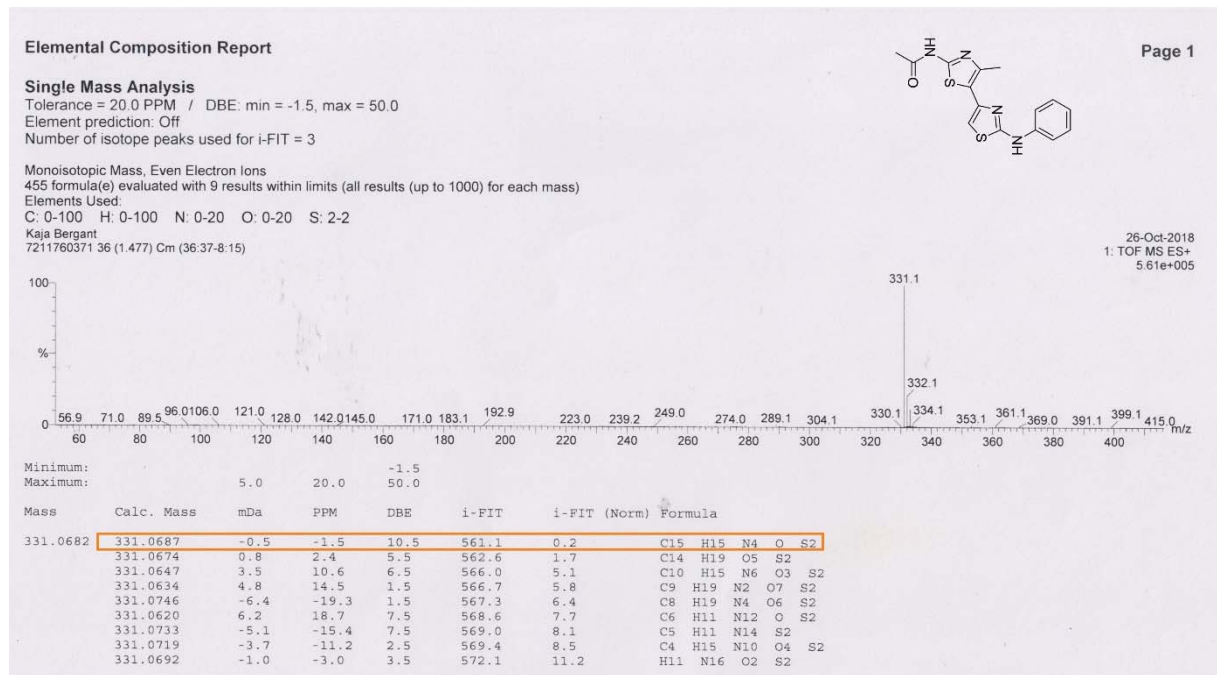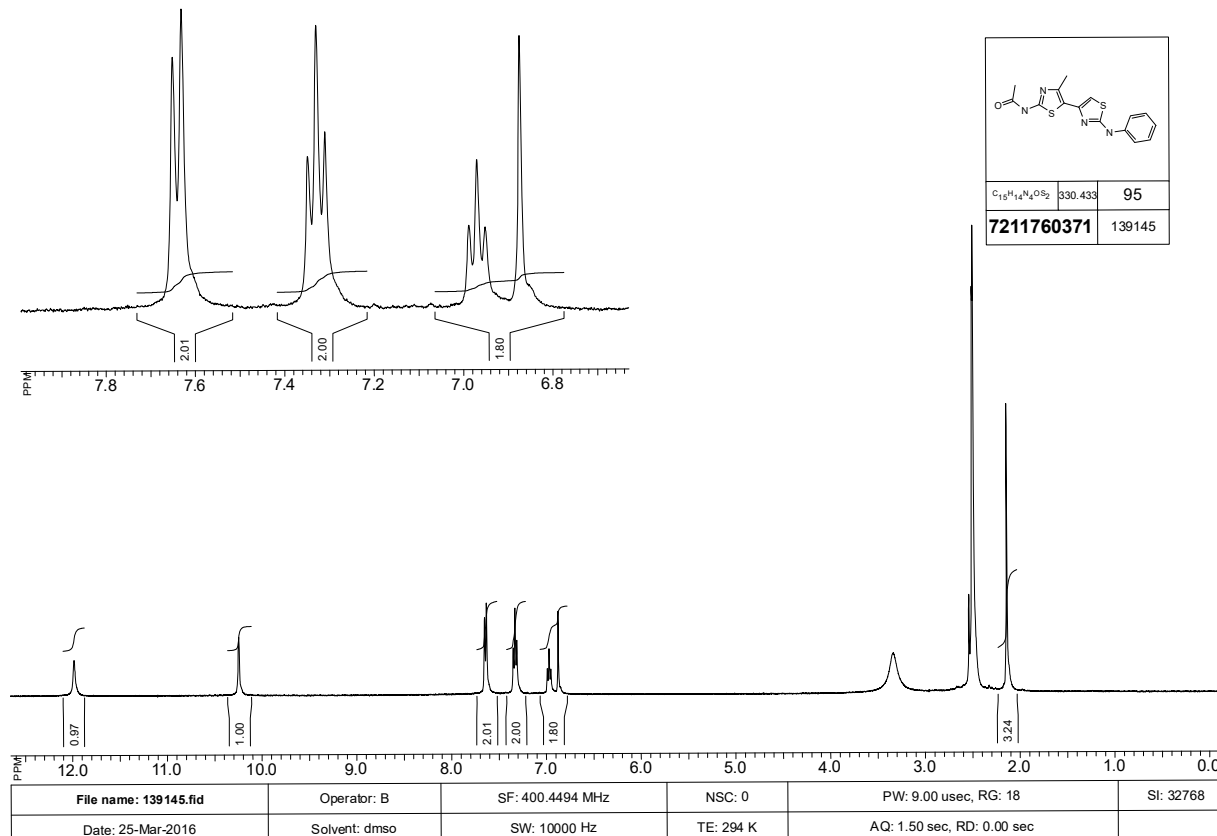

# Etoposide

## Elemental Composition Report

Page 1

### Single Mass Analysis

Tolerance = 10.0 PPM / DBE: min = -1.5, max = 50.0

Element prediction: Off

Number of isotope peaks used for i-FIT = 3

Monoisotopic Mass, Even Electron Ions

2663 formula(e) evaluated with 29 results within limits (all results (up to 1000) for each mass)

Elements Used:

C: 0-100 H: 0-100 N: 0-20 O: 0-40

Kaja Bergant

Etoposide KI 31 (1.274) Cm (26:31-4:16)

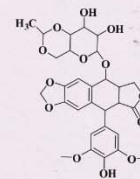

1: TOF MS ES-  
4.99e+003

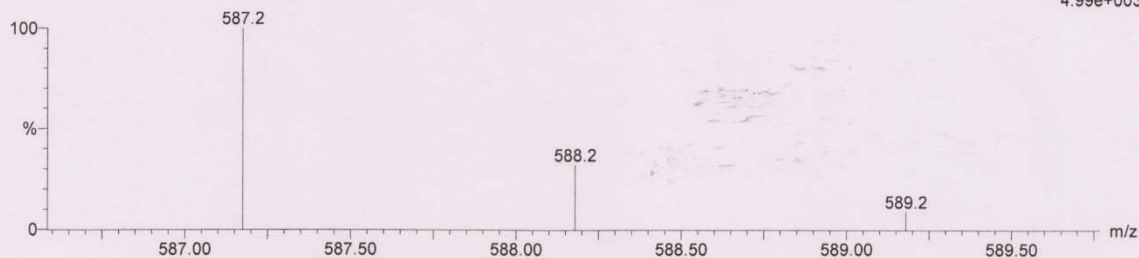

Minimum: -1.5  
Maximum: 10.0 10.0 50.0

| Mass     | Calc. Mass | mDa  | PPM  | DBE  | i-FIT | i-FIT (Norm) | Formula         |
|----------|------------|------|------|------|-------|--------------|-----------------|
| 587.1750 | 587.1765   | -1.5 | -2.6 | 14.5 | 9.2   | 0.3          | C29 H31 O13     |
|          | 587.1738   | 1.2  | 2.0  | 15.5 | 11.4  | 2.5          | C25 H27 N6 O11  |
|          | 587.1751   | -0.1 | -0.2 | 20.5 | 11.6  | 2.7          | C26 H23 N10 O7  |
|          | 587.1778   | -2.8 | -4.8 | 19.5 | 11.8  | 2.9          | C30 H27 N4 O9   |
|          | 587.1724   | 2.6  | 4.4  | 10.5 | 12.6  | 3.7          | C24 H31 N2 O15  |
|          | 587.1765   | -1.5 | -2.6 | 25.5 | 12.7  | 3.8          | C27 H19 N14 O3  |
|          | 587.1738   | 1.2  | 2.0  | 26.5 | 14.1  | 5.3          | C23 H15 N20 O   |
|          | 587.1791   | -4.1 | -7.0 | 24.5 | 14.2  | 5.4          | C31 H23 N8 O5   |
|          | 587.1724   | 2.6  | 4.4  | 21.5 | 14.4  | 5.5          | C22 H19 N16 O5  |
|          | 587.1711   | 3.9  | 6.6  | 16.5 | 15.2  | 6.4          | C21 H23 N12 O9  |
|          | 587.1706   | 4.4  | 7.5  | 23.5 | 15.5  | 6.7          | C36 H27 O8      |
|          | 587.1719   | 3.1  | 5.3  | 28.5 | 15.6  | 6.8          | C37 H23 N4 O4   |
|          | 587.1733   | 1.7  | 2.9  | 33.5 | 15.7  | 6.9          | C38 H19 N8      |
|          | 587.1805   | -5.5 | -9.4 | 29.5 | 16.2  | 7.3          | C32 H19 N12 O   |
|          | 587.1760   | -1.0 | -1.7 | 32.5 | 16.2  | 7.3          | C42 H23 N2 O2   |
|          | 587.1783   | -3.3 | -5.6 | 1.5  | 16.4  | 7.5          | C17 H35 N2 O20  |
|          | 587.1756   | -0.6 | -1.0 | 2.5  | 16.5  | 7.6          | C13 H31 N8 O18  |
|          | 587.1698   | 5.2  | 8.9  | 11.5 | 16.5  | 7.6          | C20 H27 N8 O13  |
|          | 587.1770   | -2.0 | -3.4 | 7.5  | 16.5  | 7.6          | C14 H27 N12 O14 |
|          | 587.1692   | 5.8  | 9.9  | 29.5 | 16.6  | 7.8          | C33 H19 N10 O2  |
|          | 587.1797   | -4.7 | -8.0 | 6.5  | 16.7  | 7.8          | C18 H31 N6 O16  |
|          | 587.1783   | -3.3 | -5.6 | 12.5 | 16.9  | 8.0          | C15 H23 N16 O10 |
|          | 587.1796   | -4.6 | -7.8 | 17.5 | 17.3  | 8.4          | C16 H19 N20 O6  |
|          | 587.1743   | 0.7  | 1.2  | 8.5  | 18.5  | 9.6          | C10 H23 N18 O12 |
|          | 587.1729   | 2.1  | 3.6  | 3.5  | 19.1  | 10.2         | C9 H27 N14 O16  |
|          | 587.1800   | -5.0 | -8.5 | 36.5 | 19.4  | 10.5         | C47 H23         |
|          | 587.1716   | 3.4  | 5.8  | -1.5 | 19.8  | 10.9         | C8 H31 N10 O20  |
|          | 587.1703   | 4.7  | 8.0  | 4.5  | 22.0  | 13.1         | C5 H23 N20 O14  |
|          | 587.1802   | -5.2 | -8.9 | -0.5 | 22.1  | 13.2         | C3 H27 N18 O17  |

**Table S12.** Elemental analysis data of active compounds **1**, **9** and **10**.

| Compound  | Molecular formula                                                                                        | Calculated |     |      |      | Found |     |      |      |
|-----------|----------------------------------------------------------------------------------------------------------|------------|-----|------|------|-------|-----|------|------|
|           |                                                                                                          | C          | H   | N    | S    | C     | H   | N    | S    |
| <b>1</b>  | C <sub>14</sub> H <sub>11</sub> N <sub>4</sub> S <sub>2</sub> F <sub>3</sub>                             | 47.2       | 3.1 | 15.7 | 18.0 | 45.9  | 3.2 | 15.2 | 17.6 |
| <b>9</b>  | C <sub>17</sub> H <sub>18</sub> BrN <sub>5</sub> O <sub>2</sub> S <sub>2</sub> X<br>2.5 H <sub>2</sub> O | 39.8       | 4.5 | 13.7 | 12.5 | 41.2  | 4.7 | 13.8 | 12.0 |
| <b>10</b> | C <sub>16</sub> H <sub>17</sub> BrN <sub>4</sub> O <sub>2</sub> S <sub>2</sub> X<br>4 H <sub>2</sub> O   | 37.4       | 4.9 | 10.9 | 12.5 | 38.9  | 5.0 | 11.2 | 12.5 |

**Table S13.** HPLC purity data for active compounds **1**, **7**, **10** and **14**.

|                               | Compound <b>1</b> | Compound <b>7</b> | Compound <b>10</b> | Compound <b>14</b> |
|-------------------------------|-------------------|-------------------|--------------------|--------------------|
| Area (1%) (0.001 mg/mL)       | 66680342.00       | 149750383.00      | 59760385.00        | 281812961.00       |
| Area TOTAL (100%) (1 mg/mL)   | 7084848214.00     | 4745097290.00     | 4193933896.00      | 6488929607.00      |
| Area max (100%) (1 mg/mL)     | 6705645216.00     | 4663958201.00     | 4028846164.00      | 6101844241.00      |
| Area (impurities 100%; TOTAL) | 379202998.00      | 81139089.00       | 165087732.00       | 387085366.00       |
| Purity [%]                    | 94.31             | 99.46             | 97.24              | 98.63              |
